1 **The ribosomal RNA m<sup>5</sup>C methyltransferase NSUN-1 modulates**  
2 **healthspan and oogenesis in *Caenorhabditis elegans***

3 Clemens Heissenberger<sup>1</sup>, Teresa L. Krammer<sup>1</sup>, Jarod A. Rollins<sup>2</sup>, Fabian Nagelreiter<sup>1</sup>,  
4 Isabella Stocker<sup>1</sup>, Ludivine Wacheul<sup>3</sup>, Anton Shpylovyi<sup>1</sup>, Santina Snow<sup>2</sup>, Johannes  
5 Grillari<sup>1,4,5</sup>, Aric N. Rogers<sup>2</sup>, Denis L.J. Lafontaine<sup>3</sup>, Markus Schosserer<sup>1,2\*</sup>

6

7 <sup>1</sup> Department of Biotechnology, Institute of Molecular Biotechnology, University of Natural  
8 Resources and Life Sciences, Vienna, Muthgasse 18, 1190 Vienna, Austria

9 <sup>2</sup> MDI Biological Laboratory, 159 Old Bar Harbor Rd, 04609 Maine, USA

10 <sup>3</sup> RNA Molecular Biology, Fonds de la Recherche Scientifique (F.R.S./FNRS), Université  
11 Libre de Bruxelles (ULB), B-6041 Charleroi-Gosselies, Belgium

12 <sup>4</sup> Christian Doppler Laboratory for Biotechnology of Skin Aging, Department of  
13 Biotechnology, BOKU, Vienna, Austria

14 <sup>5</sup> Ludwig Boltzmann Institute of Experimental and Clinical Traumatology, 1200 Vienna,  
15 Austria

16

17 **\*correspondence:** Dr. Markus Schosserer, Department of Biotechnology, Institute of  
18 Molecular Biotechnology, University of Natural Resources and Life Sciences, Vienna,  
19 Muthgasse 18, 1190 Vienna, Austria

20 **E-mail:** [markus.schosserer@boku.ac.at](mailto:markus.schosserer@boku.ac.at)

## 21 **Abstract**

22 Our knowledge about the repertoire of ribosomal RNA modifications and the enzymes  
23 responsible for installing them is constantly expanding. Previously, we reported that NSUN-5  
24 is responsible for depositing m<sup>5</sup>C at position C2381 on the 26S rRNA in *Caenorhabditis*  
25 *elegans*.

26 Here, we show that NSUN-1 is writing the second known 26S rRNA m<sup>5</sup>C at position C2982.  
27 Depletion of *nsun-1* or *nsun-5* improved locomotion at midlife and resistance against heat  
28 stress, however, only soma-specific knockdown of *nsun-1* extended lifespan. Moreover,  
29 soma-specific knockdown of *nsun-1* reduced body size and impaired fecundity, suggesting  
30 non-cell-autonomous effects. While ribosome biogenesis and global protein synthesis were  
31 unaffected by *nsun-1* depletion, translation of specific mRNAs was remodelled leading to  
32 reduced production of collagens, loss of structural integrity of the cuticle and impaired barrier  
33 function.

34 We conclude that loss of a single enzyme required for rRNA methylation has profound and  
35 highly specific effects on organismal physiology.

## 36 Introduction

37 Ageing is a complex biological process, characterized by progressive aggravation of cellular  
38 homeostasis defects and accumulation of biomolecular damages. According to the  
39 ‘disposable soma theory’ of ageing, organisms may invest energy either in reproduction or in  
40 somatic maintenance (Kirkwood and Holliday, 1979). This explains why most lifespan-  
41 extending interventions come at the cost of decreased fecundity. *De novo* protein synthesis by  
42 ribosomes, the most energy-demanding process in living cells, affects the balance between  
43 ageing and reproduction. In fact, reduced overall protein synthesis was shown to extend  
44 lifespan in several model organisms, including the nematode *Caenorhabditis elegans*  
45 (Hansen et al., 2007; Pan et al., 2007; Syntichaki et al., 2007). Although some evidence  
46 indicates that a link between ribosome biogenesis and gonadogenesis in *C. elegans* may exist  
47 (Voutev et al., 2006), the precise relationship between these pathways in multicellular  
48 organisms is still poorly understood. It is conceivable that the optimal function of ribosomes,  
49 which requires the presence of ribosomal RNA (rRNA) and ribosomal protein (r-protein)  
50 modifications, is monitored by the cell at several stages during development. Thus,  
51 introduction of these modifications might participate in the control of cell fate and cell-cell  
52 interactions during development (Hokii et al., 2010; Voutev et al., 2006).

53 Eukaryotic ribosomes are composed of about 80 core r-proteins and four different rRNAs,  
54 which together are assembled into a highly sophisticated nanomachine carrying the essential  
55 functions of mRNA decoding, peptidyl transfer and peptidyl hydrolysis (Ban et al., 2014;  
56 Natchiar et al., 2017; Penzo et al., 2016; Sharma and Lafontaine, 2015; Sloan et al., 2017).  
57 Until recently, ribosomes were considered as static homogenous ribonucleoprotein complexes  
58 executing the translation of cellular information from mRNA to catalytically active or  
59 structural proteins. However, mounting evidence suggests the possibility of ribosomes being

60 heterogeneous in composition with the possibility that some display differential translation  
61 with distinct affinity for particular mRNAs (Genuth and Barna, 2018). Such heterogeneity in  
62 composition may originate from the use of r-protein paralogs, r-protein post-translational  
63 modifications, or rRNA post-transcriptional modifications. Indeed, around 2% of all  
64 nucleotides of the four rRNAs are decorated with post-transcriptional modifications, which  
65 are introduced by specific enzymes such as dyskerin and fibrillarin, guided by specific small  
66 nucleolar RNAs (snoRNA) (Penzo et al., 2016; Sloan et al., 2017). The most abundant rRNA  
67 modifications are snoRNA-guided 2'O-methylations of nucleotide ribose moieties and  
68 isomerization of uridine to pseudouridine ( $\Psi$ ). However, some base modifications, which  
69 occur less frequently than 2'O-methylations of ribose and pseudouridines, are installed by  
70 specific enzymes, which were largely assumed to be stand-alone rRNA methyltransferases.  
71 One exception is the acetyltransferase Kre33 (yeast)/NAT10 (human), which is guided by  
72 specialized box C/D snoRNPs (Sharma et al., 2015; Sleiman and Dragon, 2019). Most of  
73 these base modifications are introduced at sites close to the decoding site, the peptidyl  
74 transferase centre, or the subunit interface. Intriguingly, prokaryotes and eukaryotes share the  
75 majority of modifications located in the inner core of the ribosome (Natchiar et al., 2017).

76 In eukaryotes inspected so far, the large ribosomal subunit contains two m<sup>5</sup>C residues. This is  
77 notably the case in budding yeast (on 25S rRNA), in the nematode worm (26S) and in human  
78 cells (28S) (Sharma and Lafontaine, 2015). Rcm1/NSUN-5, an enzyme of the NOP2/Sun  
79 RNA methyltransferase family, is responsible for introducing m<sup>5</sup>C at residue C2278 and  
80 C2381 on 25S/26S rRNA in yeast and worms, respectively (Gigova et al., 2014; Schosserer  
81 et al., 2015; Sharma et al., 2013). Recently, our group and others identified the conserved  
82 target cytosines in humans and mice, namely C3782 and C3438, respectively (Janin et al.  
83 2019, Heissenberger et al. 2019). We also reported that lack of this methylation is sufficient  
84 to alter ribosomal structure and ribosome fidelity during translation, while extending the

85 lifespan and stress resistance of worms, flies and yeast (Schosserer et al., 2015). However,  
86 the identity of the second worm m<sup>5</sup>C rRNA methyltransferase remains unknown.

87 Here, we report that NSUN-1 is responsible for writing the second *C. elegans* 26S m<sup>5</sup>C  
88 (position C2982). We then investigate the physiological roles of NSUN-1, comparing them  
89 systematically to those of NSUN-5. We show that NSUN-1 and NSUN-5 distinctly modulate  
90 fundamental biological processes such as ageing, mobility, stress resistance and fecundity. In  
91 particular, depletion of *nsun-1* impairs fecundity, gonad maturation and remodels translation  
92 of specific mRNAs leading to cuticle defects. We conclude that loss of NSUN-1 introducing  
93 a single rRNA modification is sufficient to profoundly and specifically alter ribosomal  
94 function and, consequently, essential cellular processes.

95

## 96 **Results**

### 97 **NSUN-1 is responsible for writing m<sup>5</sup>C at position C2982 on *C. elegans* 26S rRNA**

98 Previously, we showed that an m<sup>5</sup>C modification is introduced at position C2381 on the 26S  
99 rRNA of *C. elegans* large ribosomal subunit by NSUN-5 (Adamla et al. 2019; Schosserer et  
100 al. 2015), which is required to modulate animal lifespan and stress resistance (Schosserer et  
101 al., 2015). On this basis, we were interested to learn if other related rRNA methyltransferases  
102 in *C. elegans* might display similar properties.

103 Therefore, we investigated the RNA substrate of NSUN-1 (also formerly known as NOL-1,  
104 NOL-2 or W07E6.1) and its potential roles in worm physiology. NSUN-1 is also a member  
105 of the NOP2/Sun RNA methyltransferase family. Since there are only two known m<sup>5</sup>C  
106 residues on worm 26S rRNA (Sharma and Lafontaine, 2015; Trixl and Lusser, 2019), one of  
107 them at C2381, being installed by NSUN-5, we speculated that NSUN-1 might be required

108 for introducing the second m<sup>5</sup>C residue at position C2982. Notably, both 26S m<sup>5</sup>C sites are  
109 localized close to important functional regions of the ribosome, and they are highly conserved  
110 during evolution (Fig. 1A,B).

111 In order to test if NSUN-1 is involved in large ribosomal subunit m<sup>5</sup>C methylation, 26S  
112 rRNA was purified from worms treated with siRNAs specific to NSUN-1-encoding mRNAs  
113 on sucrose gradients, digested to single nucleosides and analysed by quantitative HPLC. In  
114 our HPLC assay, the m<sup>5</sup>C nucleoside eluted at 12 min, as established with a m<sup>5</sup>C calibration  
115 control (data not shown).

116 The depletion of NSUN-1 was conducted in two genetic backgrounds: N2 (wildtype), and  
117 NL2099 (an RNAi-hypersensitive strain due to mutation in *rrf-3*) (Figure 1–figure  
118 supplement 1). Treating N2 worms with an empty control vector, not expressing any RNAi,  
119 did not significantly reduce the levels of 26S rRNA m<sup>5</sup>C methylation (Fig. 1C, 97% instead  
120 of 100%). Interestingly, treating N2 worms with an RNAi construct targeting *nsun-1* led to a  
121 reduction of 26S rRNA m<sup>5</sup>C methylation by 35% (Fig. 1C). In the NL2099 strain, *nsun-1*  
122 RNAi treatment also led to a reduction of 26S rRNA m<sup>5</sup>C methylation by 26% (Fig. 1D).

123 As there are only two known modified m<sup>5</sup>C residues on worm 26S rRNA, and since one of  
124 them is introduced by NSUN-5 (Adamla et al., 2019; Schosserer et al., 2015), a complete loss  
125 of NSUN-1 activity was expected to result in a 50% decrease in m<sup>5</sup>C methylation. However,  
126 protein depletion achieved with RNAi is usually not complete. It is not clear why the level of  
127 m<sup>5</sup>C depletion was not higher in the RNAi hypersensitive strain in comparison to the N2  
128 strain; nonetheless, RNAi-mediated depletion of *nsun-1* significantly reduced the levels of  
129 26S rRNA m<sup>5</sup>C modification in both worm strains, thus, we conclude that NSUN-1 is  
130 responsible for 26S rRNA m<sup>5</sup>C methylation.

131 We analysed the 26S rRNA m<sup>5</sup>C levels in a *nsun-5* deletion strain as control (strain JGG1,  
132 Fig 1E). In this case, we observed a near 2-fold reduction in methylation (58% residual), as  
133 expected from the known involvement of NSUN-5 in modification at position C2381. When  
134 *nsun-1* was additionally depleted by RNAi in the *nsun-5* knockout animals, the level of 26S  
135 rRNA m<sup>5</sup>C was further reduced to 43%, again in agreement with our conclusion that NSUN-  
136 1 is responsible for methylating the second position, C2982.

137 To further prove that NSUN-1 is not involved in C2381 modification, methylation levels at  
138 this position were specifically tested by Combined Bisulfite Restriction Analysis (COBRA)  
139 assay in animals depleted of *nsun-1* or *nsun-5*. This method is based on bisulfite conversion  
140 of total RNA, followed by PCR amplification and restriction digest, yielding two bands in  
141 case of methylation at C2381 and three bands in case of non-methylation (Adamla et al.,  
142 2019). As expected, only *nsun-5* depletion strongly reduced methylation at C2381, and there  
143 was no residual m<sup>5</sup>C2381 in the *nsun-5* knockout strain, while *nsun-1* RNAi had no effect on  
144 modification at this position (Fig. 1F). Bisulfite sequencing is well-known to be sensitive to  
145 RNA secondary structure (Warnecke et al., 2002), which likely explains why, despite  
146 repeated attempts, we could not monitor modification at position C2982 by use of this  
147 technique.

148 In conclusion, NSUN-1 and NSUN-5 are each responsible for installing one m<sup>5</sup>C onto the  
149 worm 26S rRNA, with NSUN-1 being responsible for position C2982 and NSUN-5 for  
150 position C2381 under the *bona fide* assumption that indeed only two m<sup>5</sup>C positions are  
151 present as described (Sharma and Lafontaine, 2015).

152

153 **The somatic tissue-specific depletion of *nsun-1* extends healthy lifespan**

154 Next, we investigated if knockdown of *nsun-1* modulates healthy lifespan in a similar fashion  
155 as *nsun-5* (Schosserer et al., 2015). For this aim, we depleted *nsun-1* by RNAi in N2 wildtype  
156 animals starting from day 0 of adulthood and, surprisingly, did not observe any extension of  
157 mean or maximum lifespan (Fig. 2A). Consequently, we also evaluated the stress resistance  
158 of adult worms upon *nsun-1* or *nsun-5* depletion, as an increased health at an advanced age  
159 often improves resilience to adverse events (Lithgow et al., 1994). Indeed, depletion of either  
160 *nsun-1* or *nsun-5* increased resistance to heat stress compared to the RNAi control (Fig. 2B).  
161 Similarly, we tracked the movement of animals exposed to either empty vector control or  
162 RNAi directed against *nsun-1* or *nsun-5* in a time course analysis, starting at day 1 of  
163 adulthood up to day 16. Interestingly, we observed a trend towards increased average speed  
164 in all three independent experiments at day 8 of adulthood in both *nsun-1* (+47.8%) and *nsun-*  
165 *5* (+34.7%) depleted animals compared to the control, and, to a lesser extent at day 12 (*nsun-*  
166 *1* RNAi: +10.2%, *nsun-5* RNAi: +73.5% compared to the control) (Fig. 2C). Thus, while  
167 *nsun-1* knockdown does not extend lifespan, it improves the healthspan parameters  
168 thermotolerance and locomotion (Bansal et al., 2015; Rollins et al., 2017).

169 Intrigued that depletion of *nsun-1* did not extend the lifespan of *C. elegans* in a similar  
170 fashion as *nsun-5* did when whole adult animals were treated with RNAi, we reasoned that  
171 performing tissue-specific depletion of *nsun-1* might help us to further elucidate a possible  
172 effect on lifespan. We focused on the comparison of the germline and somatic tissues,  
173 because somatic maintenance and ageing are evolutionarily tightly connected (Kirkwood and  
174 Holliday, 1979), and signals from the germline modulate *C. elegans* lifespan (Hsin and  
175 Kenyon, 1999). In addition, only loss of soma- but not germline-specific eIF4E isoforms,  
176 which are central regulators of cap-dependent translation, extend nematode lifespan  
177 (Syntichaki et al., 2007). To test if *nsun-1* has similar specificity, we made use of worm  
178 strains sensitive to RNAi only in either the germline or somatic tissues. This is achieved, on



179 the one hand by mutation of *rrf-1*, which is required for amplification of the dsRNA signal  
180 specifically in the somatic tissues (Kumsta and Hansen, 2012; Sijen et al., 2001), and, on the  
181 other hand by functional loss of the argonaute protein *ppw-1* rendering the germline resistant  
182 to RNAi (Tijsterman et al., 2002). Interestingly, germline-specific *nsun-1* RNAi had no effect  
183 on animal lifespan (Fig. 2D), but depletion of *nsun-1* in somatic tissues reproducibly  
184 increased mean lifespan by ~10% (Fig. 2E).

185 In conclusion, both NSUN-1 and NSUN-5 m<sup>5</sup>C rRNA methyltransferases modulate  
186 thermotolerance and mobility of wildtype nematodes at midlife. Whole-animal *nsun-5*  
187 depletion expands mean lifespan by 17% (Schosserer et al., 2015), and in contrast to this, a  
188 10% lifespan extension is only detected after depletion of *nsun-1* specifically in the somatic  
189 tissues.

190

### 191 **The somatic tissue-specific depletion of *nsun-1* affects body size, fecundity, and gonad** 192 **maturation**

193 The ‘disposable soma theory’ of ageing generally posits that long-lived species exhibit  
194 impaired fecundity and reduced number of progeny. The underlying cause is that energy is  
195 invested in the maintenance of somatic tissues instead of rapid reproduction (Kirkwood and  
196 Holliday, 1979). In keeping with this theory, we expected that the absence of *nsun-1* in  
197 somatic tissues, which increased longevity, may reduce fecundity. Therefore, we first  
198 measured the brood size upon *nsun-1* and *nsun-5* depletion by RNAi. After reaching  
199 adulthood but before egg-laying, worms were transferred to individual wells of cell culture  
200 plates containing NGM-agar and fed with bacteria expressing the specific RNAi or, as  
201 control, the empty vector. Egg production was impaired upon *nsun-1* knockdown (reduced by  
202 42%), but, surprisingly, this was not the case upon *nsun-5* knockdown (reduced by 2%) (Fig.

203 3A). Egg production ceased rapidly after day one in all conditions (Figure 3–figure  
204 supplement 1A).

205 Thus far, all the experiments were performed on worms subjected to adult-onset *nsun-1*  
206 knockdown, as animals depleted of *nsun-1* during development were smaller and were  
207 infertile upon adulthood. To follow up on these observations, we measured mRNA  
208 expression levels of both m<sup>5</sup>C rRNA methyltransferases at different developmental stages  
209 including eggs, L1/L2 larvae, L3 larvae, L4 larvae and young adults. RT-qPCR indicated that  
210 both *nsun-1* and *nsun-5* mRNA levels constantly increase during development (Fig. 3B). The  
211 same observation applied to mRNA levels of *nsun-2* and *nsun-4* (Figure 3–figure supplement  
212 1B), indicating that all four members of the NSUN-protein family might play important roles  
213 during development.

214 To further assess whether *nsun-1* expression is indeed necessary for progressing faithfully  
215 through larval stages, we captured images of young adult animals subjected to larval-onset  
216 RNAi. The disparity in body size between RNAi control and *nsun-1* RNAi was apparent,  
217 whereby *nsun-1* depleted animals showed reduced length by approximately 20%.  
218 Interestingly, this reduced body size was not seen upon *nsun-5* RNAi treatment (Fig. 3C,D).

219 In addition, we imaged 3-day old animals using differential interference contrast (DIC)  
220 microscopy. Worms subjected to *nsun-1* knockdown displayed morphological alterations,  
221 specifically the gonad appeared severely distorted (Fig. 3E). In contrast, RNAi control and  
222 *nsun-5* RNAi showed comparable morphology of distal and proximal gonads (Fig. 3E).  
223 Consequently, we hypothesized that *nsun-1* RNAi treated worms might be arrested in early  
224 L4 larval stage when the gonad is not yet fully developed and animals still grow, instead of  
225 reaching normally adulthood after 3 days like RNAi control or *nsun-5* RNAi treated  
226 nematodes. To test this, we used the TP12 *kaIs12[col-19::GFP]* translational reporter strain,

227 which expresses COL-19::GFP specifically upon reaching adulthood, but not during larval  
228 stages. Surprisingly, larval-onset RNAi against *nsun-1* or *nsun-5* did not reveal differences in  
229 the expression of COL-19::GFP as compared to RNAi control, suggesting that neither *nsun-1*  
230 nor *nsun-5* induce larval arrest (Fig. 3F). Together with the reduced brood size upon adult-  
231 onset RNAi, these findings imply that loss of *nsun-1* induces phenotypic changes in the  
232 reproductive organs of *C. elegans* independent of development.

233 Since knockdown of *nsun-1* extended lifespan only when it was applied to somatic tissues,  
234 we hypothesized that body length might also be affected when these tissues are specifically  
235 targeted for depletion. To test this, we depleted *nsun-1* specifically in the germline or in  
236 somatic tissues using tissue-specific RNAi strains and measured body size during three  
237 consecutive days after adulthood was reached. While germline-specific knockdown of *nsun-1*  
238 did not induce any changes in body size (Fig. 3G), soma-specific knockdown revealed a  
239 decrease in body length by 23% on day 1, 11% on day 2 and 12% on day 3 compared to the  
240 RNAi control (Fig. 3H), phenocopying *nsun-1* depletion in wildtype animals after whole  
241 animal RNAi. Similarly, no effect of *nsun-1* knockdown was evident in another germline-  
242 specific RNAi strain, which was recently developed to enhance germline specificity (Zou et  
243 al., 2019) (Figure 3–figure supplement 1C).

244 In conclusion, *nsun-1* but not *nsun-5* depletion impairs body size and morphology of the  
245 gonad and leads to a significant reduction of brood size. Furthermore, these phenotypes are  
246 also observed when *nsun-1* is specifically knocked-down in somatic tissues, but not when  
247 depleted in the germline only.

248

249 **NSUN-1 is required for the transition of meiotic germ cells to mature oocytes**

250 To further investigate the mechanisms underlying impaired fecundity upon *nsun-1*  
251 knockdown, we analysed the morphology of the gonad in *nsun-1* depleted animals in more  
252 detail. The germline of adult hermaphrodites resides within the two U-shaped arms of the  
253 gonad, which contains germ cells at various stages of differentiation (Fig. 4A). The gonad is  
254 sequentially developing from the proliferative germ cells near the distal tip cell, through the  
255 meiotic zone into the loop region, finally culminating in fully-formed oocytes in the proximal  
256 gonad (Pazdernik and Schedl, 2013). The limiting factor for fecundity in self-fertilizing  
257 hermaphrodites is sperm produced in the spermatheca (Hodgkin and Barnes, 1991).

258 Upon visualizing the germline cell nuclei with DAPI-staining, no oocytes were observed in  
259 worms after knockdown of *nsun-1* in contrast to RNAi control treated animals (Fig. 4B). The  
260 mitotic zone at the distal end of the gonad appeared normal in *nsun-1* depleted animals,  
261 whereas oocyte production starting at the pachytene zone was hampered. Analysis of  
262 GFP::*RHO-1* and *NMY-2::GFP* expressing worm strains, which specifically express GFP in  
263 the germline, confirmed our observations (Fig. 4C, Figure 4-figure supplement 1). The  
264 gonads of control and *nsun-5* RNAi treated animals appeared normal, clearly depicting the  
265 different stages of *in-utero* embryo development, whereas the germline of *nsun-1* RNAi  
266 treated animals displayed a strikingly altered morphology.

267 Since other phenotypes observed upon *nsun-1* depletion were detected in soma- but absent  
268 from germline-specific RNAi treated strains, we hypothesized that the somatic part of the  
269 gonad might specifically require NSUN-1 for normal oocyte production. Indeed, soma-  
270 specific depletion of *nsun-1* phenocopied the distorted gonad morphology of wildtype  
271 animals exposed to *nsun-1* RNAi (Fig. 4D). Remarkably, upon germline-specific knockdown  
272 of *nsun-1*, the gonad appeared completely unaffected (Fig. 4E; Figure 4-figure supplement  
273 2).

274

275 **NSUN-1 is not essential for pre-rRNA processing and global protein synthesis**

276 Since the only known function of NSUN-1 and NSUN-5 is m<sup>5</sup>C methylation of rRNA, we  
277 reasoned that methylation-induced alterations of ribosome biogenesis and function might  
278 explain the observed phenotypes. Therefore, we tested if the presence of NSUN-1 or NSUN-  
279 5 is required for ribosomal subunit production and pre-rRNA processing. To this end, total  
280 RNA was extracted from worms treated with *nsun-1* RNAi, separated by denaturing agarose  
281 gel electrophoresis and processed for northern blot analysis (Fig. 5A,B). Again, two reference  
282 worm strains were used (N2 and NL2099). Upon *nsun-1* knockdown, we observed a mild  
283 accumulation of the primary pre-rRNA transcript and of its immediate derivative, collectively  
284 referred to as species “a” (Fig. 5A, (Bar et al., 2016; Saijou et al., 2004)), as well as a mild  
285 accumulation of the pre-rRNAs “b” and “c” (Fig. 5A,B, see lane 1 and 3 as well as 5 and 6).  
286 Again, these findings were observed in both worm backgrounds tested, N2 and NL2099.

287 For comparison, we also analysed rRNA processing in *nsun-5* deletion worms (JGG1 strain)  
288 in presence and absence of NSUN-1 (*nsun-1* RNAi in JGG1). In both cases, we noted an  
289 important reduction in the overall production of ribosomal RNAs (Fig. 5B,C), with an  
290 apparent increase of rRNA degradation (seen as an increase in accumulation of metastable  
291 RNA fragments, in particular underneath the 18S rRNA). Furthermore, we observed that  
292 NSUN-1 is not required for mature rRNA production as shown by the unaffected levels of  
293 mature 18S and 26S rRNAs (Fig. 5C). This was confirmed by determining the 26S/18S ratio,  
294 which was 1.0 as expected since both rRNAs are produced from a single polycistronic  
295 transcript (Fig. 5C). The levels of the other two mature rRNAs (5S and 5.8S) were also  
296 unaffected (Figure 5–figure supplement 1). This behaviour was shown in both worm  
297 backgrounds, N2 and NL2099, used. The overall decrease in mature ribosome production

298 observed in *nsun-5* deletion worms did not affect the ratio of mature ribosomal subunits  
299 (26S/18S ratio of 1.0) (Fig. 5C). In agreement with the reduced amounts of 18S and 26S  
300 rRNA observed in *nsun-5* deletion worms, total amounts of all precursors detected were  
301 reduced (Fig. 5B). Analysis of low molecular weight RNAs by acrylamide gel  
302 electrophoresis, revealed absence of NSUN-5 to severely inhibit processing in the internal  
303 transcribed spacer 2 (ITS2), which separates the 5.8S and 26S rRNAs on large precursors.  
304 This was illustrated by the accumulation of 3'-extended forms of 5.8S, and of short RNA  
305 degradation products (Figure 5–figure supplement 1, see lanes 3 and 4). Depletion of *nsun-1*  
306 partially suppressed the effect of *nsun-5* deletion: the overall production of mature rRNA and,  
307 in particular, the amount of mature 26S rRNA was increased (ratio of 1.2) (Fig. 5C).  
308 Consistently, the accumulation of 3'-extended forms of 5.8S and of short RNA degradation  
309 products was reduced (Figure 5–figure supplement 1).

310 In order to test if mature ribosomes of animals lacking any of the two m<sup>5</sup>C rRNA  
311 methyltransferases might be functionally defective, we analysed global protein synthesis by  
312 incorporation of puromycin in N2 worms treated with either RNAi control, *nsun-1* or *nsun-5*  
313 RNAi. Worms were exposed to puromycin for three hours at room temperature. Following  
314 lysis, puromycin incorporation was measured by western blot with an anti-puromycin  
315 antibody (Fig. 5D). Quantification of three independent experiments revealed no changes in  
316 global protein synthesis (Fig. 5E). We also performed polysome profiling which provides a  
317 “snapshot” of the pool of translationally active ribosomes. Comparison and quantification of  
318 profiles obtained from control and *nsun-1* knockdown nematodes did not reveal any  
319 differences in the distribution of free subunits, monosomes and polysomes (Fig. 5F,G). This  
320 agrees with the absence of global protein translation inhibition in the metabolic (puromycin)  
321 labelling assay (Fig. 5E).

322 In conclusion, NSUN-1 is not required for rRNA processing nor for global translation. On the  
323 contrary, the amounts of ribosomal subunits were reduced in the absence of NSUN-5. The  
324 ribosomal biogenesis alterations observed upon *nsun-5* depletion result from a combination  
325 of processing inhibitions in ITS2 and increased rRNA intermediates turnover. However,  
326 global translation was not detectably affected.

327

### 328 **mRNAs encoding cuticle collagens are translationally repressed upon *nsun-1*** 329 **knockdown**

330 Since depletion of *nsun-1* did not affect global protein synthesis, we hypothesized that loss of  
331 26S rRNA m<sup>5</sup>C methylation might modulate the translation of specific mRNAs, as was  
332 previously observed after Rcm1 (NSUN-5 homolog) depletion in yeast (Schosserer et al.,  
333 2015). To test this possibility, we isolated mRNAs contained in the polysome fraction,  
334 systematically sequenced them by RNAseq and compared their respective abundance in  
335 polysomes versus total mRNAs contained in the lysate before fractionation. We considered  
336 only protein-coding mRNAs with a minimum fold change of 2 between translome and  
337 transcriptome and an adjusted p-value cut-off at 0.05 (Fig. 6A; Supplemental Data File 1).  
338 The translation of more mRNAs was repressed (RNAi control: 599, *nsun-1* RNAi: 536) than  
339 promoted (RNAi control: 94, *nsun-1* RNAi: 84). Since the composition of 3' UTRs can affect  
340 translation (Tushev et al., 2018), we analysed GC-content, length and minimal free folding  
341 energy of all coding, promoted and repressed mRNAs in our dataset (Fig. 6B). Interestingly,  
342 all three features significantly differed between RNAi control and *nsun-1* RNAi in promoted  
343 and repressed mRNAs ( $p < 0.05$ ), while they remained unchanged when analysing all coding  
344 mRNAs present in the dataset. These findings suggest that loss of *nsun-1* causes the  
345 translation of specific subsets of mRNAs based on the composition and length of their

346 3'UTRs. Moreover, 3'UTRs of mRNAs repressed by *nsun-1* depletion were exclusively and  
347 significantly enriched ( $p < 0.001$ ) for several binding motifs of ASD-2, GLD-1 and RSP-3  
348 (Supplemental Data File 2). All three RNA binding proteins play essential roles in *C. elegans*  
349 development (Lee and Schedl, 2010; Longman et al., 2000) and were not differentially  
350 regulated in the transcriptome between *nol-1* RNAi and RNAi control (Supplementary Data  
351 File 3).

352 To further understand the mechanistic link between differential translation and the  
353 phenotypes observed upon *nsun-1* knockdown, we performed GO-term enrichment analysis.  
354 Among others, GO terms associated with collagens, structural integrity of the cuticle and  
355 embryo development were significantly enriched amongst those mRNAs, which were  
356 translationally repressed by *nsun-1* knockdown (Fig. 6C, Supplemental Data File 4).

357 Since three collagens (*col-35*, *col-36* and *col-37*) were also among the five most strongly  
358 repressed genes upon loss of *nsun-1* (Fig. 6A), we decided to assess whether collagen  
359 deposition is indeed altered. For this aim, we performed a specific histological staining  
360 protocol in which young collagen is stained blue and mature collagen is stained pink to  
361 brownish-red (Herovici, 1963; Teuscher et al., 2019). While young adult worms exposed to  
362 RNAi control showed presence of both young and mature collagen, animals subjected to  
363 *nsun-1* RNAi displayed a strikingly reduced collagen deposition compared to the  
364 cytoplasmatic counter-stain (yellow) (Fig. 6D).

365 Interestingly, we repeatedly observed an increased fraction of animals displaying gonad  
366 extrusion upon *nsun-1* RNAi, which might be caused by loss of cuticle structural integrity. To  
367 quantify this phenotype, we classified mid-aged animals according to the grade of gonad  
368 extrusion into three categories: i) no visible signs of gonad extrusion, ii) mild extrusion, or  
369 iii) severe extrusion (Figure 6–figure supplement 1A). Upon *nsun-1* depletion, 134 of 220



370 animals (~60%) showed mild to severe extrusion of the gonad (categories ii and iii), while no  
371 extrusion was observed in any of the tested 50 RNAi control nematodes (Fig. 6E). To assess  
372 further physiological consequences of altered collagen deposition, we tested cuticle barrier  
373 activity. This assay is based on the principle Hochst33342 dye being membrane permeable,  
374 but cuticle impermeable. As previously described by Ewald et al. 2015, worms were grouped  
375 into four categories: i) not permeable (no stained nuclei in the animal tail region), ii) mildly  
376 permeable (< 5 stained nuclei), iii) permeable (5-10 stained nuclei), or iv) highly permeable  
377 (>10 stained nuclei) (Figure 6–figure supplement 1B,C). Consistent with a change of several  
378 collagens, *nsun-1* RNAi caused cuticle permeability (categories ii, iii and iv) in 26 of 46  
379 animals (~56%) compared to only 5 of 51 RNAi control animals (~10%) (Fig. 6F).

380 Taken together, this indicates that NSUN-1 is partially required for translation of several  
381 cuticle collagens, which might not only explain the loss of gonad integrity, but also the  
382 increased cuticle permeability upon *nsun-1* depletion. Moreover, several mRNAs whose  
383 translation depends on NSUN-1 are associated with embryogenesis and enriched for binding  
384 motifs of known regulators of nematode development.

385

## 386 **Discussion**

387 Although rRNAs are universally modified at functionally relevant positions, little is known  
388 about the biological functions and pathological roles of RNA methylation sites, or about their  
389 potential readers, writers and erasers (Sharma and Lafontaine, 2015). In this work we have  
390 investigated the molecular and physiological roles of two structurally related Sun-domain-  
391 containing RNA methyltransferases, NSUN-1 and NSUN-5 in *C. elegans*, each responsible  
392 for writing one m<sup>5</sup>C mark on 26S rRNA. We further describe NSUN-1 as a *bona fide* m<sup>5</sup>C

393 rRNA writer enzyme that, if missing, directly entails physiological and developmental  
394 consequences. We conclude that, molecularly, loss of NSUN-1 function leads to translational  
395 remodelling with profound consequences on cell homeostasis, exemplified by loss of cuticle  
396 barrier function, and highly specific developmental defects, including oocyte maturation  
397 failure. We further suggest that extrusion of the gonad and loss of cuticle barrier function are  
398 directly caused by reduced expression of collagens, while the developmental defects are  
399 associated with altered expression of several important developmental regulators. We  
400 summarized the observed RNAi phenotypes in different strain backgrounds in Table 1.

401 According to the ‘disposable soma theory of aging’, a balance between somatic repair and  
402 reproduction exists. Depending on the current environment, an organism may direct the  
403 available energy either to maintenance of the germline and thereby ensuring efficient  
404 reproduction, or to the homeostasis of somatic cells including the prevention of DNA damage  
405 accumulation (Kirkwood and Holliday, 1979). While most of the known genetic and  
406 nutritional interventions increase the lifespan of organisms, they antagonistically also reduce  
407 growth, fecundity and body size (Kapahi, 2010; Kenyon et al., 1993). Indeed, reduction of  
408 overall protein synthesis by genetic, pharmacological or dietary interventions was  
409 reproducibly shown to extend longevity in different ageing model organisms (Chiocchetti et  
410 al., 2007; Curran and Ruvkun, 2007; Hansen et al., 2007; Kaeberlein et al., 2005; Masoro,  
411 2005; Pan et al., 2007). These reports clearly established protein synthesis as an important  
412 regulator of the ageing process at the interface between somatic maintenance and  
413 reproduction. Thus, we were surprised to find that despite their ability to modulate healthy  
414 ageing and to methylate rRNA, neither NSUN-1 nor NSUN-5 were required for global  
415 protein synthesis in worms under the conditions tested. In the case of NSUN-5 depletion, we  
416 previously found overall translation to be decreased in mammalian cells (Heissenberger et al.,  
417 2019), but not in yeast (Schosserer et al., 2015). We reasoned that the higher complexity of

418 mammalian ribosomes and associated factors might render them more vulnerable to  
419 alterations of rRNA secondary structure, for example by loss of a single base modification,  
420 than ribosomes from yeast and nematodes.

421 As ribosome biogenesis or global translational activity *per se* were not severely affected by  
422 loss of NSUN-1, the idea of a mechanism to ‘specialize’ the ribosome by rRNA  
423 modifications for selective mRNA translation seems attractive (Simsek and Barna, 2017).  
424 Indeed, lack of NSUN-1 and presumably the methylation at C2982 resulted in decreased  
425 translation of mRNAs containing GLD-1 and ASD-2 binding sites. These two proteins are  
426 closely related members of the STAR protein family involved in mRNA binding, splicing and  
427 nuclear export of mRNAs. While the molecular functions of ASD-2 are only poorly  
428 understood, the role of GLD-1 in embryonic development is well characterized (Lee and  
429 Schedl, 2010). GLD-1 levels are highest in the pachytene (also referred to as meiotic zone),  
430 where GLD-1 acts as a translational repressor of mRNAs modulating oogenesis. At the  
431 transition zone between the pachytene and the diplotene, GLD-1 levels sharply decrease and  
432 previously repressed mRNAs are consequently translated. Since the gonads of *nsun-1*  
433 knockdown animals appeared defective precisely at this transition and GLD-1 target mRNAs  
434 were repressed, we speculate that either ribosomes lacking the methylation at C2982 have  
435 generally low affinity for these mRNAs, or that translational repression by GLD-1 is never  
436 fully relieved. Although the expression of GLD-1 itself was not differentially regulated  
437 between control and *nsun-1* depleted animals at transcription or translation level  
438 (Supplemental Data File 1 and 3), multiple direct or indirect interactions with NSUN-1 to  
439 modulate ribosome function are still conceivable and will require further studies.

440 Previously, Curran and Ruvkun reported that depletion of *nsun-1* (W07E6.1) by adult-onset  
441 RNAi was able to extend lifespan in *C. elegans* (Curran and Ruvkun, 2007). The authors used  
442 for their high throughput screen a strain carrying a mutation in the *eri-1* gene, rendering it

443 hypersensitive to RNAi in the whole body, but especially in neurons and in the somatic gonad  
444 (Kennedy et al., 2004). In this study, we conducted a whole-body knockdown in N2 wildtype  
445 animals, but could not verify these previous findings on lifespan, although thermotolerance  
446 and the health status of mid-aged nematodes, as assessed by quantifying locomotion  
447 behaviour, were elevated. However, when knocking-down *nsun-1* specifically in somatic  
448 tissues, but not in the germline, we observed a lifespan extension. The N2 wildtype strain is  
449 usually resistant to RNAi in the somatic gonad and neurons. Thus, we hypothesize that  
450 depletion of *nsun-1* specifically in the somatic part of the gonad is required for lifespan  
451 extension, which is only effectively realised in the *eri-1* and *ppw-1* mutant strains, but not in  
452 N2 wildtype animals. Intriguingly, these findings further suggest possible non-cell-  
453 autonomous effects of single RNA methylations, since modulation of NSUN-1 levels in  
454 somatic cells profoundly affected distinct cells of the germline.

455 The developing gonad of L1 larvae consists of two primordial germ cells and two  
456 surrounding somatic gonad precursor niche cells. The crosstalk between these two cell types,  
457 which form the germline and somatic part of the gonad at later stages of larval development,  
458 was already described to modulate ageing and stress responses. Laser depletion of both  
459 primordial germ cells extends lifespan via insulin/IGF-signalling, while animals with an  
460 additional depletion of the two somatic gonad precursor cells have a normal lifespan (Hsin  
461 and Kenyon, 1999). Of potential relevance to our study is a recent report by Ou and  
462 coworkers, who demonstrated that IFE-4 regulates the response to DNA damage in  
463 primordial germ cells in a non-cell-autonomous manner via FGF-like signalling. Soma-  
464 specific IFE-4 is involved in the specific translation of a subset of mRNA including *egl-15*.  
465 Thereby, IFE-4 regulates the activity of CEP-1/p53 in primordial germ cells despite not being  
466 present there (Ou et al., 2019). We thus hypothesize that selective translation of mRNAs by  
467 specialized ribosomes, either generated by association with translational regulators such as

468 IFE-4, or by RNA modifications as described here, might serve as a general mechanism to  
469 tightly control essential cellular processes even in distinct cells and tissues.

470 Elucidating the precise mechanism is of importance, as human NSUN1 (also known as NOP2  
471 or P120) was shown to be required for mammalian preimplantation development (Cui et al.,  
472 2016) and thus indicates evolutionary conservation. Cui and colleagues found that NSUN1  
473 has an indispensable role during blastocyst development within their experimental setup.  
474 Additionally, other groups reported that low levels of NSUN1 reduce cell growth in  
475 leukaemia cells, which is in line with findings that NSUN1 promotes cell proliferation.  
476 Moreover, high NSUN1 expression results in increased tumour aggressiveness and  
477 augmented 5-azacytidine (5-AZA) resistance in two leukaemia cell lines (Bantis et al., 2004;  
478 Cheng et al., 2018; Saijo et al., 2001). Thus, NSUN1 might be considered as an example of  
479 ‘antagonistic pleiotropy’. According to this theory, genes can be indispensable early in life  
480 but negligible later, for instance after sexual reproduction. While NSUN1 appears to be  
481 essential for normal development, it might increase tumour aggressiveness later in life,  
482 especially in highly proliferative cells and tissues.

483

## 484 **Material and Methods**

### 485 Worm strains and culture conditions

486 The following *C. elegans* strains were used in this study: N2; JGG1 *nsun-5(tm3898)*, SA115  
487 *unc-119(ed3)*, JJ1473 *unc-119(ed3)*, TP12 *kaIs12[col-19::GFP]*, DCL569 *mkcSi13[P<sub>sun-1</sub>*  
488 *1::rde-1::sun-1 3'UTR + unc-119(+)]*, NL2098 *rrf-1(pk1417)* and NL2550 *ppw-1(pk2505)*.  
489 Worms were cultured following standard protocols on *Escherichia coli* OP50-seeded NGM  
490 agar plates at 20°C, unless indicated otherwise (Brenner, 1974).

491

492 RNAi knockdown

493 The *nsun-1* RNAi clones was from the J. Ahringer library (Dong et al., 2003) and the *nsun-5*  
494 RNAi clone from the M. Vidal library (Rual et al., 2004). For inactivating *nsun-1* and *nsun-5*,  
495 feeding of double-stranded RNA expressed in bacteria was used (Timmons et al; 2001).  
496 Therefore, the HT115 strain of *E. coli*, carrying either the respective RNAi construct or the  
497 empty vector (L4440) as RNAi control, was cultured overnight in LB medium with  
498 ampicillin and tetracyclin at 37°C. Bacteria were harvested by centrifugation, resuspended in  
499 LB medium and either 100 µL (60 mm plates) or 400 µL (100 mm plates) were plated on  
500 NGM containing 1 mM isopropyl-b-D-thiogalactoside and 25 µg/mL carbenicillin. The plates  
501 were incubated at 37°C overnight and used within one week.

502 Larval-onset RNAi was achieved by bleaching adult animals. Released eggs were transferred  
503 directly to plates seeded with RNAi bacteria. Adulthood was usually reached after three days  
504 and animals were used for experiments when the RNAi control strain started to lay eggs.

505 In case of adult-onset RNAi, eggs were transferred to plates seeded with RNAi control  
506 bacteria. Animals were raised until egg production commenced and subsequently transferred  
507 to the respective RNAi bacteria.

508

509 Differential Interference Contrast (DIC) microscopy

510 Worms were paralyzed using 1 M sodium azide solution and mounted on 2% agar pads.  
511 Images were acquired on a Leica DMI6000B microscope with a 10x dry objective (NA 0.3)  
512 or a 63x glycerol objective (NA 1.3) in DIC brightfield mode. Cropping, insertion of scale

513 bars and brightness and contrast adjustments were done with Image J (version 2.0.0-rc-  
514 65/1.51w; Java 1.8.0\_162 [64-bit]).

515

## 516 Mobility

517 Animals were either synchronized by timed egg-lay (two replicates) or by hypochlorite  
518 treatment (one replicate) on RNAi control plates. When reaching adulthood, nematodes were  
519 transferred to RNAi plates. Every few days at regular intervals, plates were rocked in order to  
520 induce movement of animals and videos were subsequently recorded for one minute. Worms  
521 were transferred to fresh plates whenever necessary. At day 16 the vast majority of worms  
522 completely ceased movement, thus we did not include any later timepoints. Notably, we did  
523 not notice any obvious aversion behavior or elevated speed at young age upon *nsun-1* or  
524 *nsun-5* RNAi, which was previously shown to be present upon depletion of other components  
525 of the translational machinery (Melo and Ruvkun, 2012). Worm Lab version 4.1.1 was used  
526 to track individual animals and calculate the average speed.

527

## 528 Lifespan assays

529 Lifespan measurement was conducted as previously described (Schosserer et al., 2015). For  
530 lifespan assays, 90 adults per condition were transferred to plates seeded with the respective  
531 RNAi bacteria (control, *nsun-1*, *nsun-5*). Wildtype worms were pre-synchronised on NGM  
532 plates seeded with UV-killed OP50 bacteria. 50 adult worms were transferred to NGM plates  
533 and allowed to lay eggs for 15 h; then the adult worms were removed. Synchronisation by  
534 timed egg lay was performed 72 h after the pre-synchronisation by transferring 350 gravid  
535 worms from the pre-synchronisation to fresh NGM plates seeded with RNAi control bacteria

536 and allowed to lay eggs for four hours. After 68 h, 90 young adult worms per condition were  
537 placed on fresh NGM plates containing 5 mL NGM, 100  $\mu$ L bacterial suspension and 50  $\mu$ g  
538 FUDR. This day represents day 0 in the lifespan measurement. Worms were scored as  
539 “censored” or “dead” every two to four days. Nematodes were scored as “censored” if they  
540 had crawled off the plate, were missing or died due to other causes than ageing, such as  
541 gonad extrusion. Animals were transferred to fresh plates every 3–7 days depending on the  
542 availability of the bacterial food source. Lifespans were performed at 20°C. Kaplan-Meier  
543 survival curves were plotted and log-rank statistics were calculated.

544

#### 545 Thermotolerance

546 Thermotolerance was assessed as previously described (Vieira et al., 2017). Animals were  
547 synchronized by hypochlorite treatment and released eggs were transferred to NGM plates  
548 seeded with RNAi control bacteria and kept at 20°C. After 48 h, L4 animals were picked on  
549 RNAi control, *nsun-1* or *nsun-5* RNAi plates and exposed to RNAi for approximately three  
550 days (68 hours). Subsequently, plates were transferred to 35°C and scored every 1-2 h for  
551 survival.

552

#### 553 Body size

554 Worms were synchronized by hypochlorite treatment and incubated in liquid S-Basal  
555 medium overnight. On the following day, eggs/L1 were transferred to RNAi plates (RNAi  
556 control, *nsun-1* and *nsun-5* RNAi). Three days later, worms were transferred to agar pads and  
557 paralyzed using sodium azide and visualized using DIC microscopy (see above).

558

#### 559 Brood size analysis



560 Worms were synchronised by treatment with hypochlorite solution and incubated in S-Basal  
561 at room temperature overnight. L1 larvae were subsequently transferred to NGM plates  
562 seeded with RNAi control bacteria. After 48 h, L4 animals were transferred to individual  
563 wells of a 24-well plate seeded with the respective RNAi bacteria (HT115, *nsun-1*, *nsun-5*).  
564 Each well contained 1.5 mL of NGM agar and 3  $\mu$ L of bacterial suspension (1:2 dilution in S-  
565 Basal). Worms were transferred to a new well every day for four consecutive days and total  
566 progeny of individual animals was counted. Per condition and experiment, five worms were  
567 analysed.

568

#### 569 Global protein synthesis by puromycin incorporation

570 Puromycin incorporation was measured as previously described (Tiku et al., 2018) with  
571 minor modifications. Heat-inactivated OP-50 (75°C, 40 min) were provided as food source  
572 during pulse labelling. As negative controls, RNAi control treated worms were used either  
573 without addition of puromycin or by pulse-labelling at 4°C instead of 20°C. Around 100  
574 animals per condition were harvested for western blot analysis. Lysis was done directly in  
575 SDS loading dye (60  $\mu$ M Tris/HCl pH 6.8, 2% SDS, 10% glycerol, 0.0125% bromophenol  
576 blue and 1.25%  $\beta$ -mercaptoethanol). Worms in SDS loading dye were homogenized with a  
577 pellet pestle for 1 min. Then, the samples were heated to 95°C and loaded on 4-15% Mini-  
578 PROTEAN<sup>®</sup> TGX gels (BioRad) in Laemmli-Buffer (25 mM Tris, 250 mM glycine and 0.1%  
579 SDS). Protein bands were transferred to PVDF-membranes (Bio Rad) at 25 V and 1.3 A for 3  
580 min. After blocking with 3% milk in PBS, the membrane was incubated overnight at 4°C  
581 with a mixture of anti-Histone H3 (Abcam ab1791, 1:4000) and anti-puromycin (Millipore  
582 12D10, 1:10000). After washing and secondary antibody incubation (IRDye680RD and  
583 IRDye800CW, 1:10000), the membrane was scanned on the Odyssey Infrared Imager (LI-

584 COR). Quantification of band intensities was performed in Image J (version 2.0.0-rc-  
585 65/1.51w; Java 1.8.0\_162 [64-bit]).

586

### 587 Polysome profiling

588 Two-day-old adult worms were used to generate polysome profiles as previously described  
589 (Rogers et al., 2011). One hundred microliter worm-pellet were homogenized on ice in 300  
590  $\mu$ L of solubilisation buffer (300 mM NaCl, 50 mM Tris-HCl (pH 8.0), 10 mM  $MgCl_2$ , 1 mM  
591 EGTA, 200  $\mu$ g/ml heparin, 400 U/ml RNAsin, 1.0 mM phenylmethylsulfonyl fluoride, 0.2  
592 mg/ml cycloheximide, 1% Triton X-100, 0.1% sodium deoxycholate) using a pellet pestle.  
593 700  $\mu$ l additional solubilisation buffer were added, vortexed briefly, and placed on ice for 10  
594 min before centrifugation at 20.000 g for 15 min at 4°C. Approximately 0.9 mL of the  
595 supernatant was applied to the top of a linear 10-50% sucrose gradient in high salt resolving  
596 buffer (140 mM NaCl, 25 mM Tris-HCl (pH 8.0), 10 mM  $MgCl_2$ ) and centrifuged in a  
597 Beckman SW41Ti rotor (Beckman Coulter, Fullerton, CA, USA) at 180.000 g for 90 min at  
598 4°C.

599

### 600 RNA Seq

601 Gradients were fractionated while continuously monitoring the absorbance at 260 nm. Trizol  
602 LS (Life Technologies) was immediately added to collected fractions and RNA was isolated  
603 following the manufacturer's protocol. PolyA-selection, generation of a strand-specific  
604 cDNA library and sequencing on the HiSeq 4000 platform (Illumina) using the 50 bp SR  
605 mode was performed by GATC Biotech (Konstanz, Germany). At least 30 million reads were  
606 generated per sample.

607 FASTQ Trimmer by column (Galaxy Version 1.0.0) was used to remove the first 12 bases  
608 from the 5' end of each read due to an obvious base bias in this region, as detected by FastQC  
609 (Galaxy Version 0.69). Filter by quality (Galaxy Version 1.0.0) was performed using a cut-  
610 off value of 20 and only reads with a maximum number of 8 bases with quality lower than the  
611 cut-off value were retained. RNA STAR (Galaxy Version 2.6.0b-1) was used to align reads to  
612 the WBcel235 reference genome using the default options. Aligned reads with a minimum  
613 alignment quality of 10 were counted using htseq-count (Galaxy Version 0.9.1).

614 Differential expression was analyzed using the DEseq2 package in R. The contrast

615  $\sim \text{batch} + \text{condition}$

616 (batch = biological replicate, condition = sample description) was applied to compare the  
617 polysome fraction to the total RNA of either RNAi control or *nsun-1* RNAi treated samples.  
618 Afterwards, results were filtered in R to contain only protein-coding genes (according to  
619 ENSEMBL annotation), genes with detectable expression (base mean > 1), a fold change of >  
620 2 ( $\log_2\text{FC} > 1$ ) and an adjusted p-value of < 0.05. Vulcano plots were generated in R using  
621 the EnhancedVulcano package, labelling the top 5 up- and down-regulated genes  
622 respectively.

623 GO term enrichment using DAVID (version 6.7) was performed as previously described  
624 (Rollins et al., 2019). Only protein-coding genes with detectable expression (base mean > 1),  
625 a fold change of > 2 and an adjusted p-value of < 0.10 were considered. For visualization,  
626 only the broadest GO terms of the GOTERM\_BP\_FAT, GOTERM\_MF\_FAT and  
627 GOTERM\_CC\_FAT categories, which were still significantly enriched (FDR < 0.05), are  
628 shown while similar terms based on the same subset of genes but lower in hierarchy were  
629 manually removed. Full results are contained in the supplements.

630 UTR characterization and RBP motif enrichment were performed as previously described  
631 (Rollins et al., 2019) using only protein-coding genes with detectable expression (base mean  
632 > 1), a fold change of > 2 and an adjusted p-value of < 0.10.

633 The raw and processed sequencing data are available from the Gene Expression Omnibus  
634 database (<https://www.ncbi.nlm.nih.gov/geo>) under accession GSE143618.

635 The R-script for analyzing RNA-seq data is provided as Supplemental Data File 5.

636

### 637 RT-qPCR

638 Samples were collected by either transferring worms individually into 1.5 mL tubes or by  
639 washing them off NGM plates using S-Basal. After three washing steps with S-Basal, 300 µL  
640 TRIzol<sup>®</sup> LS Reagent were added to approximately 100 µL residual S-Basal including worms.  
641 Subsequently, worms were homogenised with a pellet pestle for one minute, 600 µl TRIzol<sup>®</sup>  
642 LS Reagent were added and the sample was vortexed for five minutes at room temperature.  
643 Total RNA was isolated using Direct-zol<sup>™</sup> RNA MiniPrep Kit (Zymo) according to the  
644 instructions by the manufacturer. For cDNA synthesis, 500 ng RNA were converted into  
645 cDNA using the Applied Biosystems<sup>™</sup> High-Capacity cDNA Reverse Transcription Kit  
646 (Thermo Fisher Scientific). cDNA was amplified from total RNA using random primers. RT-  
647 qPCR was performed on a Rotor-Gene Q (QIAGEN) using HOT FIREPol<sup>®</sup> EvaGreen<sup>®</sup>  
648 qPCR Mix. The absolute amounts of mRNAs were calculated by computing a standard curve  
649 and the resulting copy numbers were normalized to the housekeeping genes act-1 and tba-1.

650 The following primers were used: nsun-1: 5'-TCGCCGAGATCCACAGAAAT-3' (sense)  
651 and 5'-CCACGTTTCATTCCACGGTTG-3' (antisense); nsun-2: 5'-  
652 GCTTAAACGAGAGACGGGAGTT-3' (sense) and 5'-CACCAGTATCCTGGGCGTG-3'  
653 (antisense); nsun-4: 5'-TGTTGGATATGTGTGCGGCT-3' (sense) and 5'-

654 GCGTCCTTGCGTTTTAGGAC-3' (antisense); nsun-5: 5'-  
655 GGCCAAGGAGAAAAGTGTG-3' (sense) and 5'-GATCCACCGATATTCGCAT-3'  
656 (antisense); act-1: 5'-CTACGAACTTCTGACGGACAAG-3' (sense) and 5'-  
657 CCGGCGGACTCCATACC-3' (antisense) and tba-1: 5'-TCAACACTGCCATCGCCGCC-  
658 3' (sense) and 5'-TCCAAGCGAGACCAGGCTTCAG-3' (antisense).

659 For measuring mRNA expression during development, worms were synchronised by  
660 treatment with hypochlorite solution and the released eggs were subsequently transferred to  
661 four separate NGM plates seeded with UV-killed OP50 bacteria. Samples were taken from  
662 eggs immediately after bleaching, L1/L2 (20 h after bleaching), L3 (32 h after bleaching), L4  
663 (46 h after bleaching) and young adults (60 h after bleaching).

664

### 665 3-D ribosome structure

666 The PyMOL Molecular Graphics System (Version 2.0) was used. The structure was modelled  
667 on the human 80S ribosome (PDB 6EK0).

668

### 669 m<sup>5</sup>C detection by COBRA assay

670 NSUN-5 activity was measured by the COBRA assay as previously described (Adamla et al.,  
671 2019) using the following primers: 5'-GGGAGTAATTATGATTTTTCTAAGGTAG-3' (sense)  
672 and 5'-ATAATAAATAAAAACAATAAAAATCTCACTAATCCATTCATACAC-3' (antisense).

673

### 674 HPLC analysis of m<sup>5</sup>C

675 13-15µg 26S purified on sucrose gradient were digested to nucleosides and analyzed by  
676 HPLC. Peaks elutes at 12 min and as a control, a commercial 5-methylcytidine (NM03720,  
677 CarboSynth) was used. For quantification of m<sup>5</sup>C peak area, the peak was normalized to  
678 either the peak eluting at 16 min (asterisk on the Figure), or to the peak eluting at 8 min (U),  
679 with similar results. The results are shown for normalization to the peak eluting at 16 min.

680

### 681 Pre-rRNA processing analysis

682 For analysis of high-molecular weight RNA species, 3 µg total RNA was resolved on a  
683 denaturing agarose gel (6% formaldehyde/1.2% agarose) and migrated for 16 h at 65 volts.  
684 Agarose gels were transferred by capillarity onto Hybond-N+ membranes. The membrane  
685 was prehybridized for 1 h at 65°C in 50% formamide, 5x SSPE, 5x Denhardt's solution, 1%  
686 SDS (w/v) and 200 µg/ml fish sperm DNA solution (Roche). The <sup>32</sup>P-labeled oligonucleotide  
687 probe (LD2648 (ITS1): CACTCAACTGACCGTGAAGCCAGTCG; LD2649 (ITS2):  
688 GGACAAGATCAGTATGCCGAGACGCG) was added and incubated for 1 h at 65°C and  
689 then overnight at 37°C. For analysis of low molecular weight RNA species, northern blots  
690 were exposed to Fuji imaging plates (Fujifilm) and signals acquired with a Phosphorimager  
691 (FLA-7000; Fujifilm).

692

### 693 Statistics and sample size estimation

694 No explicit power analysis was used. Sample sizes estimations were partially based on our  
695 own previous empirical experience with the respective assays, as well as the cited literature.

696 No systematic blinding of group allocation was used, but samples were always analysed in a  
697 random order. Nematodes were randomly assigned to the experimental groups. All lifespan,

698 stress resistance and locomotion experiments were performed by at least two different  
699 operators.

700 Most experiments were performed in three independent experiments, unless stated otherwise  
701 in the figure legend. Independent experiments were always initiated at different days and thus  
702 always resemble different batches of nematodes. Some experiments (RNA isolation for RNA-  
703 seq, HPLC analysis of  $m^5C$ , pre-rRNA processing analysis) were performed once with all  
704 frozen independent batches of nematodes to minimize technical variation. No outliers were  
705 detected or removed. Criteria for censoring animals for lifespan, stress resistance and  
706 locomotion experiments are indicated in the respective chapters.

707 Statistical tests used, exact values of N, definitions of center, methods of multiple test  
708 correction, and dispersion and precision measures are indicated in the respective figure  
709 legends. P-value thresholds were defined as \*P < 0.05, \*\*P < 0.01 and \*\*\*P < 0.001. For  
710 RNA-seq, statistical tests and p-value thresholds are explained in detail in the “RNA-seq”  
711 chapter.

712

## 713 **Acknowledgements**

714 We are grateful to Tamás Barnabás Könye for technical assistance; the BOKU-VIBT  
715 Imaging Center for technical support with microscopy. This work was supported by the  
716 Austrian Science Fund (FWF) and Herzfelder’sche Familienstiftung [P30623 to M.S.],  
717 Hochschuljubiläumsstiftung der Stadt Wien [H- 327123/2018 to M.S.], and the Austrian  
718 Science Fund (FWF) [I2514 to J.G.]. Research reported in this publication was supported by  
719 the James L. Boyer Fellowship at the MDI Biological Laboratory to M.S. Research  
720 conducted in the labs of A.N.R and J.A.R. was supported by an Institutional Development

721 Award (IDeA) from the National Institute of General Medical Sciences of the National  
722 Institutes of Health under grant numbers P20GM103423 and P20GM104318. Research in the  
723 Lab of D.L.J.L. is supported by the Belgian Fonds de la Recherche Scientifique  
724 (F.R.S./FNRS), the Université Libre de Bruxelles (ULB), the Région Wallonne (DGO6)  
725 [grant RIBO*cancer* n°1810070], the Fonds Jean Brachet, the International Brachet Stiftung,  
726 and the Epitran COST action (CA16120). F.N. is a fellow of the international PhD  
727 programme “BioToP-Biomolecular Technology of Proteins”, funded by the Austrian Science  
728 Fund (FWF) [W1224 to J.G.]. Some strains were provided by the CGC, which is funded by  
729 NIH Office of Research Infrastructure Programs (P40 OD010440).



## 730 **Author Contributions**

731 Planned experiments: C.H., T.L.K., J.A.R., J.G., A.N.R., D.L.J.L., M.S., performed  
732 experiments: C.H., T.L.K., I.S., A.S., S.S., M.S., analysed data: C.H., T.L.K., J.A.R., L.W.,  
733 D.L.J.L., M.S., wrote manuscript: C.H., D.L.J.L., M.S., supervised the project: M.S.

734

## 735 **References**

- 736 Adamla F, Rollins J, Newsom M, Snow S, Schosserer M, Heissenberger C, Horrocks J,  
737 Rogers AN, Ignatova Z. 2019. A Novel Caenorhabditis Elegans Proteinopathy Model  
738 Shows Changes in mRNA Translational Frameshifting During Aging. *Cell Physiol*  
739 *Biochem* **52**:970–983. doi:10.33594/000000067
- 740 Ban N, Beckmann R, Cate JHD, Dinman JD, Dragon F, Ellis SR, Lafontaine DLJ, Lindahl L,  
741 Liljas A, Lipton JM, McAlear MA, Moore PB, Noller HF, Ortega J, Panse VG,  
742 Ramakrishnan V, Spahn CMT, Steitz TA, Tchorzewski M, Tollervey D, Warren AJ,  
743 Williamson JR, Wilson D, Yonath A, Yusupov M. 2014. A new system for naming  
744 ribosomal proteins. *Curr Opin Struct Biol* **24**:165–9. doi:10.1016/j.sbi.2014.01.002
- 745 Bansal A, Zhu LJ, Yen K, Tissenbaum HA. 2015. Uncoupling lifespan and healthspan in  
746 *Caenorhabditis elegans* longevity mutants. *Proc Natl Acad Sci* **112**:E277–E286.  
747 doi:10.1073/pnas.1412192112
- 748 Bantis A, Giannopoulos A, Gonidi M, Lioffi A, Aggelonidou E, Petrakakou E, Athanassiades  
749 P, Athanassiadou P. 2004. Expression of p120, Ki-67 and PCNA as proliferation  
750 biomarkers in imprint smears of prostate carcinoma and their prognostic value.  
751 *Cytopathology* **15**:25–31. doi:10.1046/j.0956-5507.2003.00090.x

- 752 Bar DZ, Charar C, Dorfman J, Yadid T, Tafforeau L, Lafontaine DLJ, Gruenbaum Y. 2016.  
753 Cell size and fat content of dietary-restricted *Caenorhabditis elegans* are regulated by  
754 ATX-2, an mTOR repressor. *Proc Natl Acad Sci U S A* **113**:E4620-9.  
755 doi:10.1073/pnas.1512156113
- 756 Cheng JX, Chen L, Li Y, Cloe A, Yue M, Wei J, Watanabe KA, Shammo JM, Anastasi J,  
757 Shen QJ, Larson RA, He C, Le Beau MM, Vardiman JW. 2018. RNA cytosine  
758 methylation and methyltransferases mediate chromatin organization and 5-azacytidine  
759 response and resistance in leukaemia. *Nat Commun* **9**:1163. doi:10.1038/s41467-018-  
760 03513-4
- 761 Chiocchetti A, Zhou J, Zhu H, Karl T, Haubenreisser O, Rinnerthaler M, Heeren G, Oender  
762 K, Bauer J, Hintner H, Breitenbach M, Breitenbach-Koller L. 2007. Ribosomal proteins  
763 Rpl10 and Rps6 are potent regulators of yeast replicative life span. *Exp Gerontol*  
764 **42**:275–286. doi:10.1016/j.exger.2006.11.002
- 765 Cui W, Pizzollo J, Han Z, Marcho C, Zhang K, Mager J. 2016. Nop2 is required for  
766 mammalian preimplantation development. *Mol Reprod Dev* **83**:124–31.  
767 doi:10.1002/mrd.22600
- 768 Curran SP, Ruvkun G. 2007. Lifespan regulation by evolutionarily conserved genes essential  
769 for viability. *PLoS Genet* **3**:0479–0487. doi:10.1371/journal.pgen.0030056
- 770 Dong Y, Poulin G, Kanapink A, Bot N Le, Welchman DP, Zipperlen P, Ahringer J. 2003.  
771 Systematic functional analysis of the *Caenorhabditis elegans* genome using RNAi.  
772 *Nature* **421**. doi:10.1038/nature01278
- 773 Ewald CY, Landis JN, Porter Abate J, Murphy CT, Blackwell TK. 2015. Dauer-independent  
774 insulin/IGF-1-signalling implicates collagen remodelling in longevity. *Nature* **519**:97–

775 101. doi:10.1038/nature14021

776 Genuth NR, Barna M. 2018. The Discovery of Ribosome Heterogeneity and Its Implications  
777 for Gene Regulation and Organismal Life. *Mol Cell* **71**:364–374.

778 doi:10.1016/j.molcel.2018.07.018

779 Gigova A, Duggimpudi S, Pollex T, Schaefer M, Koš M. 2014. A cluster of methylations in  
780 the domain IV of 25S rRNA is required for ribosome stability. *RNA* **20**:1632–44.

781 doi:10.1261/rna.043398.113

782 Hansen M, Taubert S, Crawford D, Libina N, Lee S-JJ, Kenyon C. 2007. Lifespan extension  
783 by conditions that inhibit translation in *Caenorhabditis elegans*. *Aging Cell* **6**:95–110.

784 doi:10.1111/j.1474-9726.2006.00267.x

785 Heissenberger C, Liendl L, Nagelreiter F, Gonskikh Y, Yang G, Stelzer EM, Krammer TL,  
786 Micutkova L, Vogt S, Kreil DP, Sekot G, Siena E, Poser I, Harreither E, Linder A, Ehret

787 V, Helbich TH, Grillari-Voglauer R, Jansen-Dürr P, Koš M, Polacek N, Grillari J,

788 Schosserer M. 2019. Loss of the ribosomal RNA methyltransferase NSUN5 impairs

789 global protein synthesis and normal growth. *Nucleic Acids Res* 1–19.

790 doi:10.1093/nar/gkz1043

791 Herovici C. 1963. [Picropolychrome: histological staining technic intended for the study of  
792 normal and pathological connective tissue]. *Rev Fr Etud Clin Biol* **8**:88–9.

793 Hodgkin J, Barnes TM. 1991. More is not better: brood size and population growth in a self-  
794 fertilizing nematode. *Proceedings Biol Sci* **246**:19–24. doi:10.1098/rspb.1991.0119

795 Hokii Y, Sasano Y, Sato M, Sakamoto H, Sakata K, Shingai R, Taneda A, Oka S, Himeno H,

796 Muto A, Fujiwara T, Ushida C. 2010. A small nucleolar RNA functions in rRNA

797 processing in *Caenorhabditis elegans*. *Nucleic Acids Res* **38**:5909–18.

798 doi:10.1093/nar/gkq335

799 Hsin H, Kenyon C. 1999. Signals from the reproductive system regulate the lifespan of *C.*

800 *elegans*. *Nature* **399**:362–6. doi:10.1038/20694

801 Janin M, Ortiz-Barahona V, de Moura MC, Martínez-Cardús A, Llinàs-Arias P, Soler M,

802 Nachmani D, Pelletier J, Schumann U, Calleja-Cervantes ME, Moran S, Guil S, Bueno-

803 Costa A, Piñeyro D, Perez-Salvia M, Rosselló-Tortella M, Piqué L, Bech-Serra JJ, De

804 La Torre C, Vidal A, Martínez-Iniesta M, Martín-Tejera JF, Villanueva A, Arias A,

805 Cuartas I, Aransay AM, La Madrid AM, Carcaboso AM, Santa-Maria V, Mora J,

806 Fernandez AF, Fraga MF, Aldecoa I, Pedrosa L, Graus F, Vidal N, Martínez-Soler F,

807 Tortosa A, Carrato C, Balañá C, Boudreau MW, Hergenrother PJ, Kötter P, Entian K-D,

808 Hench J, Frank S, Mansouri S, Zadeh G, Dans PD, Orozco M, Thomas G, Blanco S,

809 Seoane J, Preiss T, Pandolfi PP, Esteller M. 2019. Epigenetic loss of RNA-

810 methyltransferase NSUN5 in glioma targets ribosomes to drive a stress adaptive

811 translational program. *Acta Neuropathol*. doi:10.1007/s00401-019-02062-4

812 Kaeberlein M, Powers RW, Steffen KK, Westman EA, Hu D, Dang N, Kerr EO, Kirkland

813 KT, Fields S, Kennedy BK. 2005. Regulation of Yeast Replicative Life Span by TOR

814 and Sch9 in Response to Nutrients. *Science (80- )* **310**:1193–1196.

815 doi:10.1126/science.1115535

816 Kapahi P. 2010. Protein synthesis and the antagonistic pleiotropy hypothesis of aging. *Adv*

817 *Exp Med Biol* **694**:30–7.

818 Kennedy S, Wang D, Ruvkun G. 2004. A conserved siRNA-degrading RNase negatively

819 regulates RNA interference in *C. elegans*. *Nature* **427**:645–9. doi:10.1038/nature02302

820 Kenyon C, Chang J, Gensch E, Rudner a, Tabtiang R, Jed AF, Kirk M, Davis, Kenyon C,

- 821 Chang J, Gensch E, Rudner a, Tabtiang R. 1993. A *C. elegans* mutant that lives twice as  
822 long as wild type. *Nature* **366**:461–464. doi:10.1038/366461a0
- 823 Kirkwood TB, Holliday R. 1979. The evolution of ageing and longevity. *Proc R Soc Lond B*  
824 *Biol Sci* **205**:531–46.
- 825 Kumsta C, Hansen M. 2012. *C. elegans* rrf-1 mutations maintain RNAi efficiency in the soma  
826 in addition to the germline. *PLoS One* **7**:e35428. doi:10.1371/journal.pone.0035428
- 827 Lee M-H, Schedl T. 2010. *C. elegans* star proteins, GLD-1 and ASD-2, regulate specific  
828 RNA targets to control development. *Adv Exp Med Biol* **693**:106–22. doi:10.1007/978-  
829 1-4419-7005-3\_8
- 830 Lithgow GJ, White TM, Hinerfeld DA, Johnson TE. 1994. Thermotolerance of a long-lived  
831 mutant of *Caenorhabditis elegans*. *J Gerontol* **49**:B270-6. doi:10.1093/geronj/49.6.b270
- 832 Longman D, Johnstone IL, Cáceres JF. 2000. Functional characterization of SR and SR-  
833 related genes in *Caenorhabditis elegans*. *EMBO J* **19**:1625–37.  
834 doi:10.1093/emboj/19.7.1625
- 835 Masoro EJ. 2005. Overview of caloric restriction and ageing. *Mech Ageing Dev* **126**:913–  
836 922. doi:10.1016/j.mad.2005.03.012
- 837 Melo J, Ruvkun G. 2012. Inactivation of conserved *C. elegans* genes engages pathogen- and  
838 xenobiotic-associated defenses. *Cell* **149**:452–66. doi:10.1016/j.cell.2012.02.050
- 839 Natchiar SK, Myasnikov AG, Kratzat H, Hazemann I, Klaholz BP. 2017. Visualization of  
840 chemical modifications in the human 80S ribosome structure. *Nature* **551**:472–477.  
841 doi:10.1038/nature24482
- 842 Ou H-L, Kim CS, Uszkoreit S, Wickström SA, Schumacher B. 2019. Somatic Niche Cells

- 843 Regulate the CEP-1/p53-Mediated DNA Damage Response in Primordial Germ Cells.  
844 *Dev Cell* **50**:167-183.e8. doi:10.1016/j.devcel.2019.06.012
- 845 Pan KZ, Palter JE, Rogers AN, Olsen A, Chen D, Lithgow GJ, Kapahi P. 2007. Inhibition of  
846 mRNA translation extends lifespan in *Caenorhabditis elegans*. *Aging Cell* **6**:111–9.  
847 doi:10.1111/j.1474-9726.2006.00266.x
- 848 Pazdernik N, Schedl T. 2013. Introduction to germ cell development in *Caenorhabditis*  
849 *elegans*. *Adv Exp Med Biol* **757**:1–16. doi:10.1007/978-1-4614-4015-4\_1
- 850 Penzo M, Galbiati A, Treré D, Montanaro L. 2016. The importance of being (slightly)  
851 modified: The role of rRNA editing on gene expression control and its connections with  
852 cancer. *Biochim Biophys Acta - Rev Cancer* **1866**:330–338.  
853 doi:10.1016/j.bbcan.2016.10.007
- 854 Rogers AN, Chen D, McColl G, Czerwieńiec G, Felkey K, Gibson BW, Hubbard A, Melov  
855 S, Lithgow GJ, Kapahi P. 2011. Life span extension via eIF4G inhibition is mediated by  
856 posttranscriptional remodeling of stress response gene expression in *C. elegans*. *Cell*  
857 *Metab* **14**:55–66. doi:10.1016/j.cmet.2011.05.010
- 858 Rollins JA, Howard AC, Dobbins SK, Washburn EH, Rogers AN. 2017. Assessing Health  
859 Span in *Caenorhabditis elegans*: Lessons From Short-Lived Mutants. *J Gerontol A Biol*  
860 *Sci Med Sci* **72**:473–480. doi:10.1093/gerona/glw248
- 861 Rollins JA, Shaffer D, Snow SS, Kapahi P, Rogers AN. 2019. Dietary restriction induces  
862 posttranscriptional regulation of longevity genes. *Life Sci alliance* **2**.  
863 doi:10.26508/lsa.201800281
- 864 Rual J-F, Ceron J, Koreth J, Hao T, Nicot A-S, Hirozane-Kishikawa T, Vandenhautte J, Orkin  
865 SH, Hill DE, van den Heuvel S, Vidal M. 2004. Toward improving *Caenorhabditis*

- 866 elegans phenome mapping with an ORFeome-based RNAi library. *Genome Res*  
867 **14**:2162–8. doi:10.1101/gr.2505604
- 868 Saijo Y, Sato G, Usui K, Sato M, Sagawa M, Kondo T, Minami Y, Nukiwa T. 2001.  
869 Expression of nucleolar protein p120 predicts poor prognosis in patients with stage I  
870 lung adenocarcinoma. *Ann Oncol Off J Eur Soc Med Oncol* **12**:1121–5.  
871 doi:10.1023/a:1011617707999
- 872 Saijou E, Fujiwara T, Suzaki T, Inoue K, Sakamoto H. 2004. RBD-1, a nucleolar RNA-  
873 binding protein, is essential for *Caenorhabditis elegans* early development through 18S  
874 ribosomal RNA processing. *Nucleic Acids Res* **32**:1028–1036. doi:10.1093/nar/gkh264
- 875 Schosserer M, Minois N, Angerer TB, Amring M, Dellago H, Harreither E, Calle-Perez A,  
876 Pircher A, Gerstl MP, Pfeifenberger S, Brandl C, Sonntagbauer M, Kriegner A, Linder  
877 A, Weinhäusel A, Mohr T, Steiger M, Mattanovich D, Rinnerthaler M, Karl T, Sharma  
878 S, Entian K-D, Kos M, Breitenbach M, Wilson IBH, Polacek N, Grillari-Voglauer R,  
879 Breitenbach-Koller L, Grillari J. 2015. Methylation of ribosomal RNA by NSUN5 is a  
880 conserved mechanism modulating organismal lifespan. *Nat Commun* **6**:6158.  
881 doi:10.1038/ncomms7158
- 882 Sharma S, Lafontaine DLJJ. 2015. ‘View From A Bridge’: A New Perspective on Eukaryotic  
883 rRNA Base Modification. *Trends Biochem Sci* **40**:560–575.  
884 doi:10.1016/j.tibs.2015.07.008
- 885 Sharma S, Langhendries J-L, Watzinger P, Kötter P, Entian K-D, Lafontaine DLJ. 2015.  
886 Yeast Kre33 and human NAT10 are conserved 18S rRNA cytosine acetyltransferases  
887 that modify tRNAs assisted by the adaptor Tan1/THUMP1. *Nucleic Acids Res*  
888 **43**:2242–58. doi:10.1093/nar/gkv075

- 889 Sharma S, Yang J, Watzinger P, Kötter P, Entian K-D. 2013. Yeast Nop2 and Rcm1  
890 methylate C2870 and C2278 of the 25S rRNA, respectively. *Nucleic Acids Res* 1–15.  
891 doi:10.1093/nar/gkt679
- 892 Sijen T, Fleenor J, Simmer F, Thijssen KL, Parrish S, Timmons L, Plasterk RH, Fire A. 2001.  
893 On the role of RNA amplification in dsRNA-triggered gene silencing. *Cell* **107**:465–76.  
894 doi:10.1016/s0092-8674(01)00576-1
- 895 Simsek D, Barna M. 2017. An emerging role for the ribosome as a nexus for post-  
896 translational modifications. *Curr Opin Cell Biol* **45**:92–101.  
897 doi:10.1016/j.ceb.2017.02.010
- 898 Sleiman S, Dragon F. 2019. Recent Advances on the Structure and Function of RNA  
899 Acetyltransferase Kre33/NAT10. *Cells* **8**:1035. doi:10.3390/cells8091035
- 900 Sloan KE, Warda AS, Sharma S, Entian K-D, Lafontaine DLJ, Bohnsack MT. 2017. Tuning  
901 the ribosome: The influence of rRNA modification on eukaryotic ribosome biogenesis  
902 and function. *RNA Biol* **14**:1138–1152. doi:10.1080/15476286.2016.1259781
- 903 Syntichaki P, Troulinaki K, Tavernarakis N. 2007. eIF4E function in somatic cells modulates  
904 ageing in *Caenorhabditis elegans*. *Nature* **445**:922–6. doi:10.1038/nature05603
- 905 Teuscher AC, Statzer C, Pantasis S, Bordoli MR, Ewald CY. 2019. Assessing Collagen  
906 Deposition During Aging in Mammalian Tissue and in *Caenorhabditis elegans*. *Methods*  
907 *Mol Biol* **1944**:169–188. doi:10.1007/978-1-4939-9095-5\_13
- 908 Tijsterman M, Okihara KL, Thijssen K, Plasterk RHA. 2002. PPW-1, a PAZ/PIWI protein  
909 required for efficient germline RNAi, is defective in a natural isolate of *C. elegans*. *Curr*  
910 *Biol* **12**:1535–40. doi:10.1016/s0960-9822(02)01110-7



- 911 Tiku V, Kew C, Mehrotra P, Ganesan R, Robinson N, Antebi A. 2018. Nucleolar fibrillar is  
912 an evolutionarily conserved regulator of bacterial pathogen resistance. *Nat Commun*  
913 **9**:1–10. doi:10.1038/s41467-018-06051-1
- 914 Trixl L, Lusser A. 2019. The dynamic RNA modification 5-methylcytosine and its emerging  
915 role as an epitranscriptomic mark. *Wiley Interdiscip Rev RNA* **10**:e1510.  
916 doi:10.1002/wrna.1510
- 917 Tushev G, Glock C, Heumüller M, Biever A, Jovanovic M, Schuman EM. 2018. Alternative  
918 3' UTRs Modify the Localization, Regulatory Potential, Stability, and Plasticity of  
919 mRNAs in Neuronal Compartments. *Neuron* **98**:495-511.e6.  
920 doi:10.1016/j.neuron.2018.03.030
- 921 Vieira N, Bessa C, Rodrigues AJ, Marques P, Chan FY, de Carvalho AX, Correia-Neves M,  
922 Sousa N. 2017. Sorting nexin 3 mutation impairs development and neuronal function in  
923 *Caenorhabditis elegans*. *Cell Mol Life Sci* 1–18. doi:10.1007/s00018-017-2719-2
- 924 Voutev R, Killian DJ, Ahn JH, Hubbard EJA. 2006. Alterations in ribosome biogenesis cause  
925 specific defects in *C. elegans* hermaphrodite gonadogenesis. *Dev Biol* **298**:45–58.  
926 doi:10.1016/j.ydbio.2006.06.011
- 927 Warnecke PM, Stirzaker C, Song J, Grunau C, Melki JR, Clark SJ. 2002. Identification and  
928 resolution of artifacts in bisulfite sequencing. *Methods* **27**:101–7. doi:10.1016/s1046-  
929 2023(02)00060-9
- 930 Zou L, Wu D, Zang X, Wang Z, Wu Z, Chen D. 2019. Construction of a germline-specific  
931 RNAi tool in *C. elegans*. *Sci Rep* **9**:2354. doi:10.1038/s41598-019-38950-8
- 932

## 933 **Figures**

### 934 **Figure 1: NSUN-1 is responsible for large ribosomal subunit 26S rRNA m<sup>5</sup>C** 935 **methylation**

936 **A**, Location of the two eukaryotic large ribosomal subunit m<sup>5</sup>C residues within the 3D  
937 structure of the human ribosome. For reference, important functional sites are indicated (DCS  
938 = decoding site, PTC = peptidyl transferase centre). In *C. elegans*, NSUN-1 is responsible for  
939 m<sup>5</sup>C2982 (this work) while NSUN-5 installs m<sup>5</sup>C2381 (Schosserer et al. 2015). **B**, Regions  
940 surrounding the sites modified by NSUN-1 and NSUN-5 are evolutionarily conserved  
941 between yeast, worms and humans. The modified cytosine is indicated. **C-E**, Purified 26S  
942 rRNA was isolated by sucrose gradient centrifugation, digested to single nucleotides and  
943 analysed by quantitative HPLC. *nsun-1* knockdown consistently leads to a decrease of m<sup>5</sup>C  
944 levels. **C**, N2 worms were analysed as either: untreated (OP-50), treated with an RNAi  
945 control or with a *nsun-1* targeting RNAi. **D**, NL2099 RNAi hypersensitive worms were  
946 treated with the RNAi control or with the *nsun-1* targeting RNAi. **E**, N2 strain treated with  
947 RNAi control and the *nsun-5* deletion strain (JGG1) treated with control RNAi or a *nsun-1*  
948 targeting RNAi. For quantification of m<sup>5</sup>C peak area, the peak was normalized to the peak  
949 eluting at 16 min (asterisk). **F**, Quantification of the enzymatic activity of NSUN-5 using the  
950 COBRA assay for N2 worms, subjected to either *nsun-5* or *nsun-1* RNAi, and the *nsun-5*  
951 mutant strain JGG1 (*nsun-5*Δ). Loss of *nsun-5* leads to significantly decreased methylation  
952 levels at C2381, whereas *nsun-1* RNAi does not alter methylation at this site (three  
953 independent biological replicates, one-way ANOVA with Dunnett's post test,  $\alpha=0.05$ ,  
954 \*P<0.05, \*\*P<0.01).

955 **Figure 2: Depletion of *nsun-1* and *nsun-5* improves thermotolerance and locomotion**

956 **A**, *nsun-1* whole-body RNAi (N2 wildtype strain) does not affect lifespan. Three pooled  
957 independent biological replicates are shown. Pooled  $n \geq 208$  animals per condition, log-rank  
958 test, not significant. **B**, N2 wildtype animals treated with either *nsun-1* or *nsun-5* RNAi and  
959 subjected to heat stress (35 °C) show increased survival compared to the RNAi control. Three  
960 pooled independent biological replicates are shown. Pooled  $n \geq 90$  animals per condition, log  
961 rank,  $P < 0.05$ . **C**, Average speed [ $\mu\text{m/s}$ ] of N2 wildtype worms as indicator of the health  
962 status was measured at day 1, 4, 8, 12 and 16 of adulthood. Movies of animals treated with  
963 either RNAi control, *nsun-1* or *nsun-5* RNAi were captured. One representative experiment is  
964 shown. Three biological replicates were performed with similar outcome. Pooled  $n \geq 20$   
965 animals per condition at day 1. The black line indicates median. Two-way ANOVA  $P < 0.01$   
966 (for interaction day:RNAi treatment) **D-E**, Lifespan analysis of germline- (NL2098) and  
967 soma-specific RNAi strains (NL2550). Worms were treated with either RNAi control or  
968 *nsun-1* RNAi. Only soma-specific knockdown of *nsun-1* results in increased lifespan (**E**)  
969 while germline-specific knockdown does not (**D**) (two independent biological replicates,  
970 pooled  $n(\text{NL2098}) \geq 160$  animals per condition, log-rank, not significant, pooled  $n(\text{NL2550})$   
971  $\geq 145$  per condition, log-rank,  $P < 0.01$ ).

972 A summary of the individual replicates of lifespan and thermotolerance experiments is  
973 provided in Figure 2–Source Data 1.

974 **Figure 3: Loss of *nsun-1* reduces body size and impairs fecundity**

975 **A**, Brood size analysis of adult-onset RNAi exposed animals. Eggs of individual worms were  
976 counted and the total number of eggs per worm is shown. Knockdown of *nsun-1* but not  
977 *nsun-5* induced a significant reduction in brood size compared to control RNAi (three  
978 independent experiments,  $n = 5$  per condition and per experiment, one-way ANOVA with  
979 Dunnett's post test,  $\alpha=0.05$ ,  $**P<0.01$ ). Error bars indicate standard deviation. **B**, RT-qPCR  
980 analysis of wild-type animals at different stages of development (eggs, L1/L2 larvae, L3  
981 larvae, L4 larvae and young adults). *tba-1* was used for normalization and expression is  
982 shown relative to eggs. Error bars represent standard deviation of three biological replicates,  
983 one-sample t-test against expected value of 1 with multiple comparison correction by Holm's  
984 method did not reveal significant differences. **C**, Representative DIC images of larval-onset  
985 RNAi exposed nematodes show that only *nsun-1* but not *nsun-5* RNAi decreased the body  
986 length and altered general morphology compared to the RNAi control. Scale bar, 100  $\mu\text{m}$ . **D**,  
987 Quantification of mean body length of 1-2-day old adult worms. The body size of *nsun-1*  
988 RNAi treated worms was significantly reduced compared to the RNAi control and *nsun-5*  
989 RNAi. The experiment was independently performed two times and one representative  
990 replicate is shown.  $n(\text{RNAi control}) = 18$ ,  $n(\textit{nsun-1 RNAi}) = 25$ ,  $n(\textit{nsun-5 RNAi}) = 19$ , one-  
991 way ANOVA with Dunnett's post,  $\alpha=0.05$ ,  $***P<0.001$ . Error bars represent standard  
992 deviation. **E**, Larval-onset *nsun-1* RNAi-treated adults had reduced body size and lacked  
993 embryos (arrow). Scale bar, 50  $\mu\text{m}$ . **F**, Loss of *nsun-1* did not impair expression of the adult-  
994 specific marker *col-19::GFP*. The TP12 strain was used and young adult animals treated with  
995 either control RNAi, *nsun-1* RNAi or *nsun-5* RNAi were imaged in DIC and fluorescent  
996 mode. L4 control RNAi worms, which did not express GFP specifically in the hypodermis,  
997 were used as negative control. Scale bar, 200  $\mu\text{m}$ . **G-H**, Soma- but not germline-specific  
998 *nsun-1* RNAi phenocopied the mean body length defect upon whole body *nsun-1*

999 knockdown. The germline-specific NL2098 strain (**G**) and the soma specific NL2550 (**H**)  
1000 strain were used and measured on three consecutive days after reaching adulthood.  $n \geq 21$  for  
1001 each day and condition. Two independent experiments were performed and one  
1002 representative replicate is shown. Two-tailed t-test, \*\*\* $P < 0.001$ . Error bars represent  
1003 standard deviation.

1004 **Figure 4: Soma-specific depletion of *nsun-1* blocks oogenesis**

1005 **A**, Schematic of one gonad arm in *C. elegans*. Germ cell replication starts in the distal mitotic  
1006 zone. After passing through the meiotic zone, oocytes further mature and are fertilized by  
1007 sperm produced in the spermatheca. In panels **A-E**, an asterisk indicates the gonadal region  
1008 impaired in *nsun-1* RNAi exposed animals. This area corresponds to the transition between  
1009 the meiotic zone and oocyte maturation. **B**, Microscopic image of one gonad arm of young  
1010 adult worms subjected to either control or *nsun-1* RNAi. Worms were imaged in DIC mode  
1011 and nuclei of fixed animals were stained with DAPI. Scale bar, 40  $\mu$ m. **C**, Confocal imaging  
1012 of the gonad-specific GFP::RHO-1 expressing SA115 strain revealed altered gonad  
1013 morphology upon *nsun-1* knockdown (see also Figure 4—figure supplement 1). Scale bar, 40  
1014  $\mu$ m. **D-E**, Soma- but not germline-specific *nsun-1* RNAi phenocopied altered gonad  
1015 morphology upon whole body *nsun-1* depletion. NL2550 was used for soma- (**D**) and  
1016 NL2098 for germline-specific knockdown (**E**). One gonad arm of one representative 2-day  
1017 old adult animal was imaged in DIC mode and nuclei were stained with DAPI following  
1018 fixation. Scale bar, 40  $\mu$ m.

1019 **Figure 5: NSUN-1 and NSUN-5 are only partially required for rRNA processing and**  
1020 **not for global translation**

1021 **A**, Schematics of pre-rRNA processing intermediates in *C. elegans* and probes (LD2648 and  
1022 LD2649) used in pre-rRNA processing analysis (see panel B). **B**, Pre-rRNA processing  
1023 analysis. Total RNA extracted from the indicated strains were separated on denaturing  
1024 agarose gels and processed for northern blotting. The probes (LD2648 and LD2649) used to  
1025 detect the pre-rRNA intermediates a, b, c, c', and d are indicated. **C**, Steady-state levels of  
1026 mature rRNAs (18S and 26S) analysed by ethidium bromide staining and quantified by  
1027 densitometry. The 26S/18S ratio is indicated. **D**, Total protein synthesis of N2 animals treated  
1028 with RNAi control, *nsun-1* or *nsun-5* RNAi. RNAi control treated worms at either 4°C or  
1029 without puromycin exposure were used as negative controls. Protein synthesis was measured  
1030 by puromycin exposure for 3 h and western blot using a puromycin-specific antibody. The  
1031 experiment was performed in three independent replicates. One representative replicate is  
1032 shown. Histone H3 was used as loading control. **E**, Quantification of western blots in D  
1033 (three biological replicates, one-sample t-test against an expected value of 1,  $\alpha=0.05$ , not  
1034 significant). **F-G**, Polysome analysis indicating that global translation is not affected by *nsun-*  
1035 *1* depletion. Free small subunit (40S), large subunit (60S), monosome (80S) and polysome  
1036 fractions were detected by UV<sub>254</sub> monitoring. Representative profiles are shown. **G**,  
1037 Quantification of 60S, 80S and polysome fractions of three independent experiments reveals  
1038 no changes between *nsun-1* knockdown and RNAi control.

1039 **Figure 6: *nsun-1* depletion modulates selective translation of collagens and induces**  
1040 **gonad extrusion and loss of barrier function**

1041 **A**, Volcano plots of selectively translated genes after RNAi control and *nsun-1* RNAi  
1042 exposure. Significantly regulated genes (adjusted  $p < 0.05$  and fold-change  $> 2$ ) between  
1043 polysome fraction and total mRNAs are depicted in red, genes with a two-fold up- or down-  
1044 regulation but an adjusted p-value (FDR/ Benjamini and Hochberg) above 0.05 in green,  
1045 genes with an adjusted p-value below 0.05 but less than two-fold change in expression in  
1046 blue, and not significantly regulated genes in grey. The top five up- or down-regulated genes  
1047 based on their fold change are indicated. **B**, Characteristics of the 3'UTRs of mRNAs with  
1048 significantly promoted or repressed polysome enrichment (adjusted  $p < 0.1$ , fold-change  $> 2$ ).  
1049 GC content (in %), length (in bp) and minimum free folding energy [kcal/mol] are shown.  
1050 Boxes indicate mean  $\pm$  SD (for GC content and length) or mean  $\pm$  SEM (for minimum free  
1051 folding energy). Wilcoxon rank sum test, \* $P < 0.05$ , \*\* $P < 0.01$ , \*\*\* $P < 0.001$ . **C**, Biological GO  
1052 terms enriched among genes with repressed translation (adjusted  $p < 0.1$ , fold-change  $> 2$ )  
1053 upon *nsun-1* depletion. Modified Fisher's exact test,  $p < 0.05$ . **D**, Histological staining  
1054 (Herovici) to assess collagen deposition. Worms exposed to control RNAi show presence of  
1055 both young (blue) and mature (pink to brownish-red) collagen whereas animals subjected to  
1056 *nsun-1* RNAi display less collagen deposition. The cytoplasm is counterstained in yellow.  
1057 Representative images of the region surrounding the gonad are shown. Two independent  
1058 experiments with a minimum of 10 animals each were performed with similar outcome.  
1059 Scale-bar, 80  $\mu\text{m}$ . **E**, Quantification of gonad extrusion upon *nsun-1* depletion compared to  
1060 RNAi control. 8-9 day old adult animals were classified into three categories according to the  
1061 severance of gonad extrusion ('no signs', 'mild', 'severe', see Figure 6-figure supplement  
1062 1A). The experiment was independently performed two times with similar outcome. One  
1063 representative replicate is shown.  $n \geq 50$  animals per replicate. Modified Fisher's exact test



1064 on the raw count values,  $p < 0.001$ . **F**, Quantification of cuticle barrier function upon *nsun-1*  
1065 depletion compared to RNAi control. Young adult animals were exposed to Hoechst 33342,  
1066 which is membrane-permeable but cuticle-impermeable. Stained nuclei were counted  
1067 exclusively in the tail region to exclude intestinal autofluorescence and classified into four  
1068 categories accordingly ('none', 'low', 'medium', 'high', see Figure 6–figure supplement 1B).  
1069 Three independent experiments were pooled.  $n(\text{RNAi control}) = 51$ ,  $n(\textit{nsun-1} \text{ RNAi}) = 46$ .  
1070 Modified Fisher's exact test on the raw count values,  $p < 0.001$ .

1071 **Tables**

1072 **Table 1: Comparison of phenotypes after *nsun-1* and *nsun-5* depletion**

1073 (in green) soma-specific effects, n.d.: not determined

| Phenotype                          | <i>nsun-1</i> RNAi                                                                                                                                                                                          | <i>nsun-5</i> RNAi                                                     |
|------------------------------------|-------------------------------------------------------------------------------------------------------------------------------------------------------------------------------------------------------------|------------------------------------------------------------------------|
| Lifespan                           | <ul style="list-style-type: none"> <li>- Unaffected in whole adult treatment</li> <li>- Unaffected after germline-specific depletion</li> <li>- Increased by ~10% after soma-specific depletion</li> </ul>  | - Increased by ~17% in whole adult treatment (Schosserer et al., 2015) |
| Stress resistance (heat) in adults | Increased                                                                                                                                                                                                   | Similarly increased                                                    |
| Locomotion at midlife              | Increased                                                                                                                                                                                                   | Similarly increased                                                    |
| Brood size (fecundity)             | Reduced (2-fold)                                                                                                                                                                                            | Unaffected                                                             |
| Adult animal size                  | <ul style="list-style-type: none"> <li>- Reduced by ~20% after soma-specific depletion and whole body depletion</li> <li>- Unaffected after germline-specific depletion</li> </ul>                          | Unaffected                                                             |
| Gonad morphology                   | <ul style="list-style-type: none"> <li>- Impaired at meiotic to oocyte transition</li> <li>-Gonad extrusion (possibly caused by loss of cuticle integrity)</li> <li>- Unaffected after germline-</li> </ul> | Unaffected                                                             |

|                      |                                     |          |
|----------------------|-------------------------------------|----------|
|                      | specific depletion                  |          |
| Pre-rRNA processing  | Unaffected                          | Affected |
| Collagen expression  | Affected (translational remodeling) | n.d.     |
| Cuticle permeability | increased                           | n.d.     |

1074

## 1075 **Figure Supplements**

### 1076 **Figure 1-figure supplement 1: RNAi effectively depletes *nsun-1* in *C. elegans***

1077 Quantification of *nsun-1* mRNA levels using RT-qPCR in N2, NL2099 and JGG1 nematode  
1078 strains. Worms were subjected to control and *nsun-1* RNAi. *nsun-1* mRNA levels were  
1079 decreased to approximately 20% in N2 and JGG1, as well as to 10% in the RNAi  
1080 hypersensitive strain NL2099. *act-1* was used for normalization. Error bars represent standard  
1081 deviation of four technical replicates. This experiment was repeated independently with  
1082 similar outcome.

1083 **Figure 3-figure supplement 1: *nsun-1* depleted worms display impaired fecundity**

1084 **A**, Brood size analysis of adult-onset RNAi exposed animals. Eggs of individual worms were  
1085 counted every day until day 4 of adulthood. Knockdown of *nsun-1*, but not *nsun-5*, inflicted a  
1086 reduced brood size compared to control RNAi. Three pooled independent experiments are  
1087 shown. n = 5 per condition and per experiment. Error bars indicate standard deviation. **B**, RT-  
1088 qPCR analysis of developing wild-type animals (eggs, L1/L2 larvae, L3 larvae, L4 larvae and  
1089 young adults) revealed enhanced mRNA expression of *nsun-2* and *nsun-4* during  
1090 development. Three independent biological experiments are shown. *tba-1* was used for  
1091 normalization. Error bars represent standard deviation. **C**, Body size of 1-2 day old adult  
1092 worms of a germline-specific RNAi strain (DCL569) was measured. The body size of *nsun-1*  
1093 and *nsun-5* RNAi treated animals was not changed compared to RNAi control. n(all  
1094 conditions) = 10, one-way ANOVA with Dunnett's post,  $\alpha=0.05$ , not significant. Error bars  
1095 represent standard deviation.

1096 **Figure 4-figure supplement 1: *nsun-1* but not *nsun-5* depletion inflicts a defect in**  
1097 **oogenesis**

1098 **A, B**, Gonad specific expression of GFP::*RHO-1* (SA115 strain) (**A**) and *NMY-2*::GFP  
1099 (JJ1473 strain) (**B**) were used to visualize the morphology of the germline after *nsun-1* and  
1100 *nsun-5* knockdown. Scale bar represents 40  $\mu\text{m}$ . Oocyte maturation starting from the loop  
1101 region was impaired in *nsun-1* RNAi, but not in *nsun-5* RNAi treated animals.

1102 **Figure 4-figure supplement 2: Somatic- but not germline specific *nsun-1* depletion**  
1103 **causes defective oogenesis A-B**, Soma- but not germline-specific *nsun-1* RNAi phenocopies  
1104 altered gonad morphology of whole body *nsun-1* depletion. NL2550 was used for soma- (A)  
1105 and NL2098 for germline-specific knockdown (B). The gonad of 1-, 2- and 3-day old animals  
1106 was imaged in DIC mode and nuclei were stained with DAPI following fixation. In the soma-  
1107 specific strain maturing oocytes and embryos were observed only in RNAi control but not  
1108 in *nsun-1* RNAi subjected worms. The germline-specific strain remained entirely unaffected.  
1109 Scale bar represents 40  $\mu$ m.

1110 **Figure 5-figure supplement 1: *nsun-5* but not *nsun-1* RNAi alters 5.8S rRNA**

1111 **maturation**

1112 In the absence of *nsun-5* (JGG1 strain, lane 3 and 4) the 3'-extended forms of 5.8S and short  
1113 RNA degradation products accumulated. Upon co-depletion of *nsun-1* (lane 4), such an  
1114 accumulation is partially suppressed. When comparing the 5.8S and 5S, as well as tRNAs, no  
1115 change can be observed between control and *nsun-1* RNAi treated animals in the three  
1116 different worm strains (N2, JGG1 and NL2099).



1117 **Figure 6-figure supplement 1: *nsun-1* depletion affects gonad integrity and barrier**

1118 **function**

1119 **A**, Knockdown of *nsun-1* increased the rate and severity of gonad extrusion. Mid-aged  
1120 worms at day 8-9 of adulthood were classified into three categories according to the  
1121 severance of gonad extrusion ('no signs', 'mild', 'severe', see arrowhead). Representative  
1122 images of the categories are shown here. **B**, Reduced levels of *nsun-1* affected barrier  
1123 function. Young adult animals were incubated in 1 µg/mL Hoechst 33342, which is  
1124 membrane-permeable but cuticle-impermeable. Permeability was assessed by counting  
1125 nuclear Hoechst staining in the tail region (see arrowhead). Young adult animals were  
1126 classified into four categories ('no staining', 'low (< 5 stained nuclei)', 'medium (5-10  
1127 stained nuclei)', 'high (>10 stained nuclei)'). Representative images of the different  
1128 categories are shown here. **C**, Analysis of gonad extrusion including the results of *nsun-5*  
1129 RNAi. The experiment was independently performed two times with similar outcome. One  
1130 representative replicate is shown.  $n \geq 50$  animals per replicate.

1131 **Source Data Files for Figures**

1132 **Figure 2–Source Data 1: Summary of individual lifespan and thermotolerance**

1133 **experiments**

A

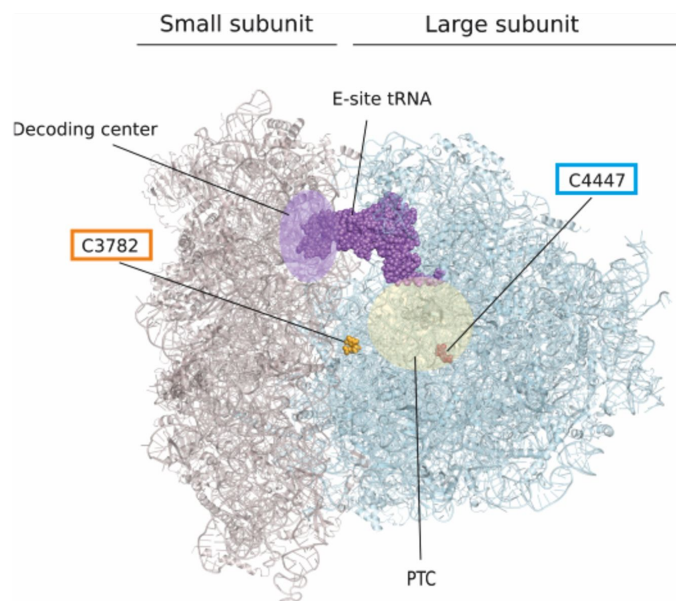

B

NSUN-1

*H. sapiens*: CGCTTTTGGATCCTTCGATGTCGGCTCTTCC*C. elegans*: TGCTTTTGGATCCTTCGATGTCGGCTCTTCC*S. cerevisiae*: TGCTTTTGGATCCTTCGATGTCGGCTCTTCC

NSUN-5

*H. sapiens*: CTCTCTTAAGGTAGCCAAATGCCTCGTCATC*C. elegans*: CTCTCTTAAGGTAGCCAAATGCCTCGTCATT*S. cerevisiae*: CTCTCTTAAGGTAGCCAAATGCCTCGTCATC

C

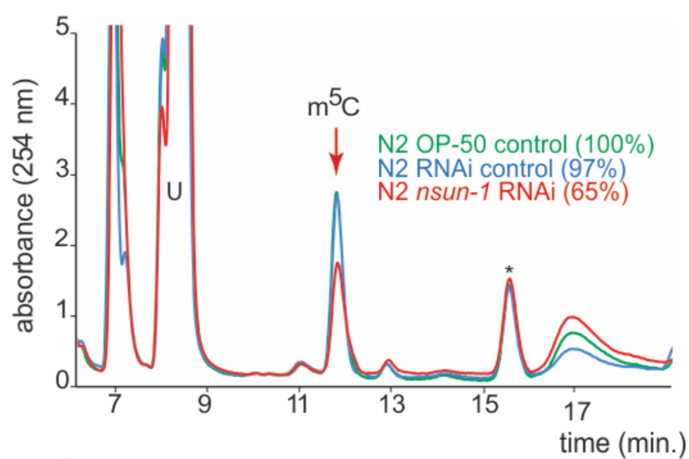

D

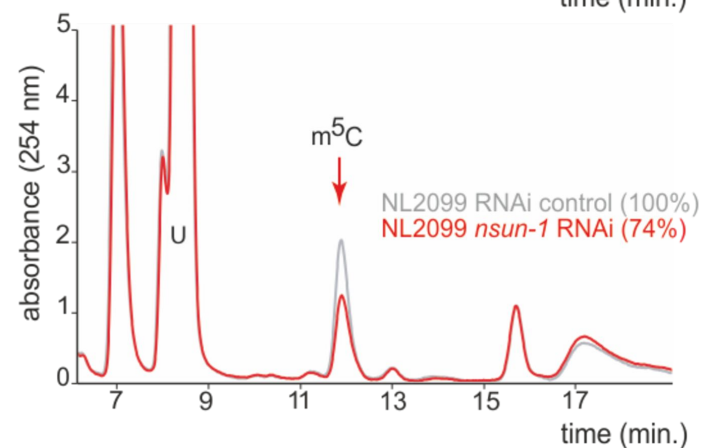

E

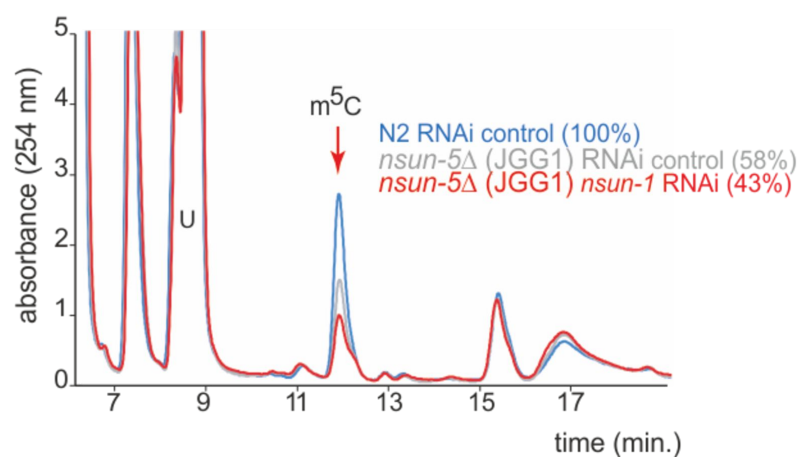

F

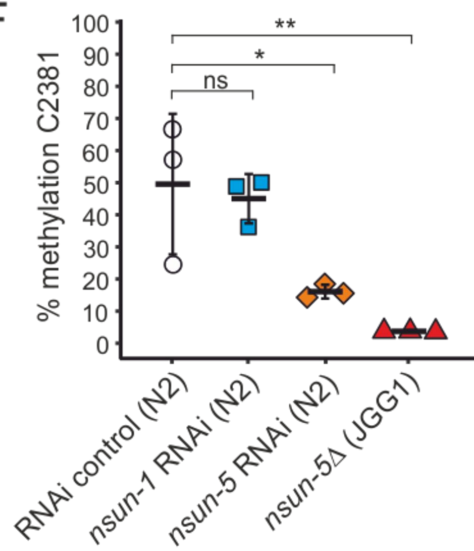

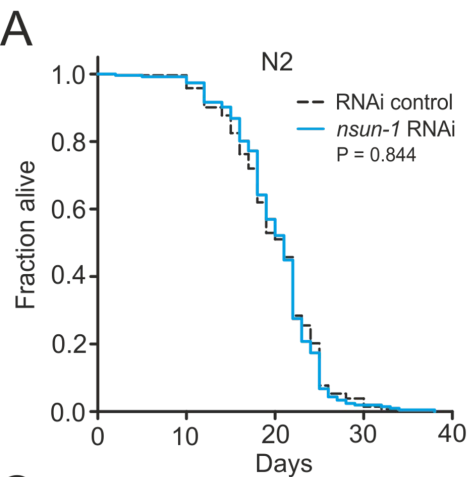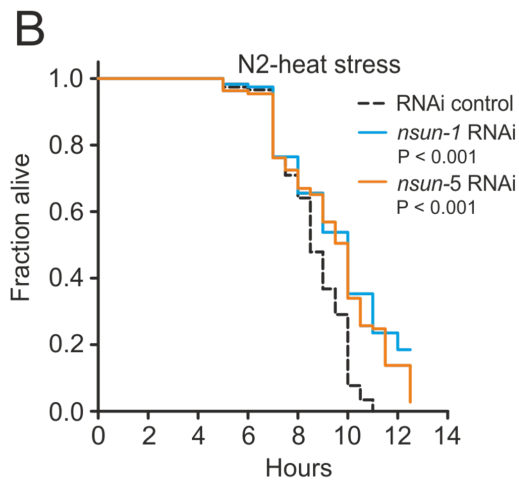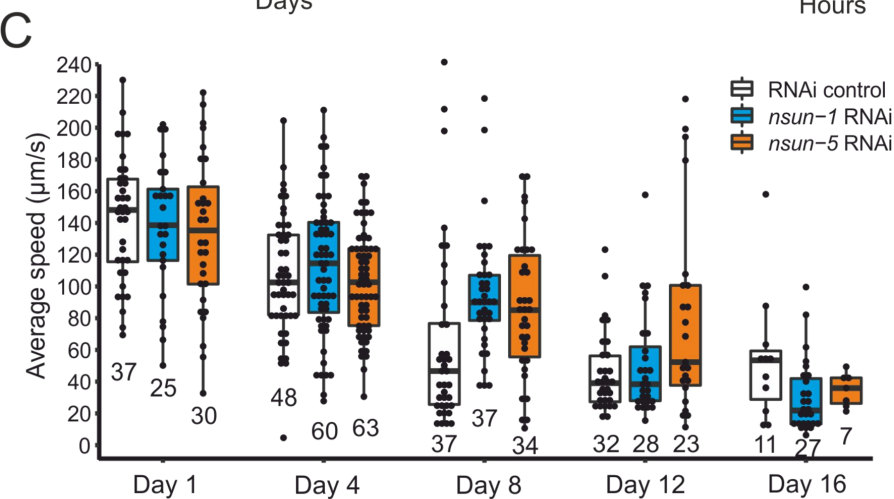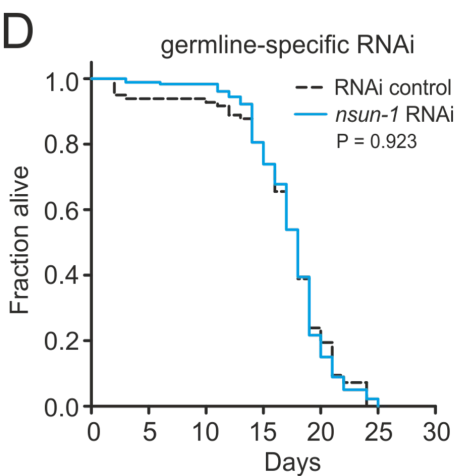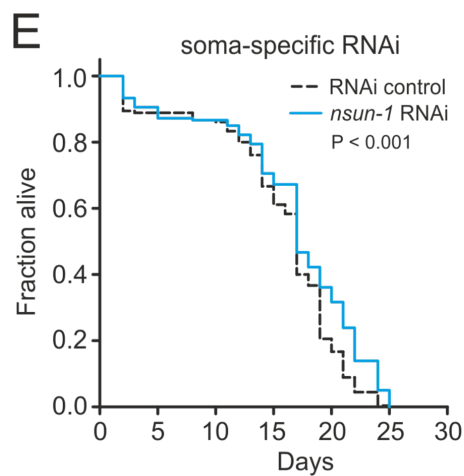

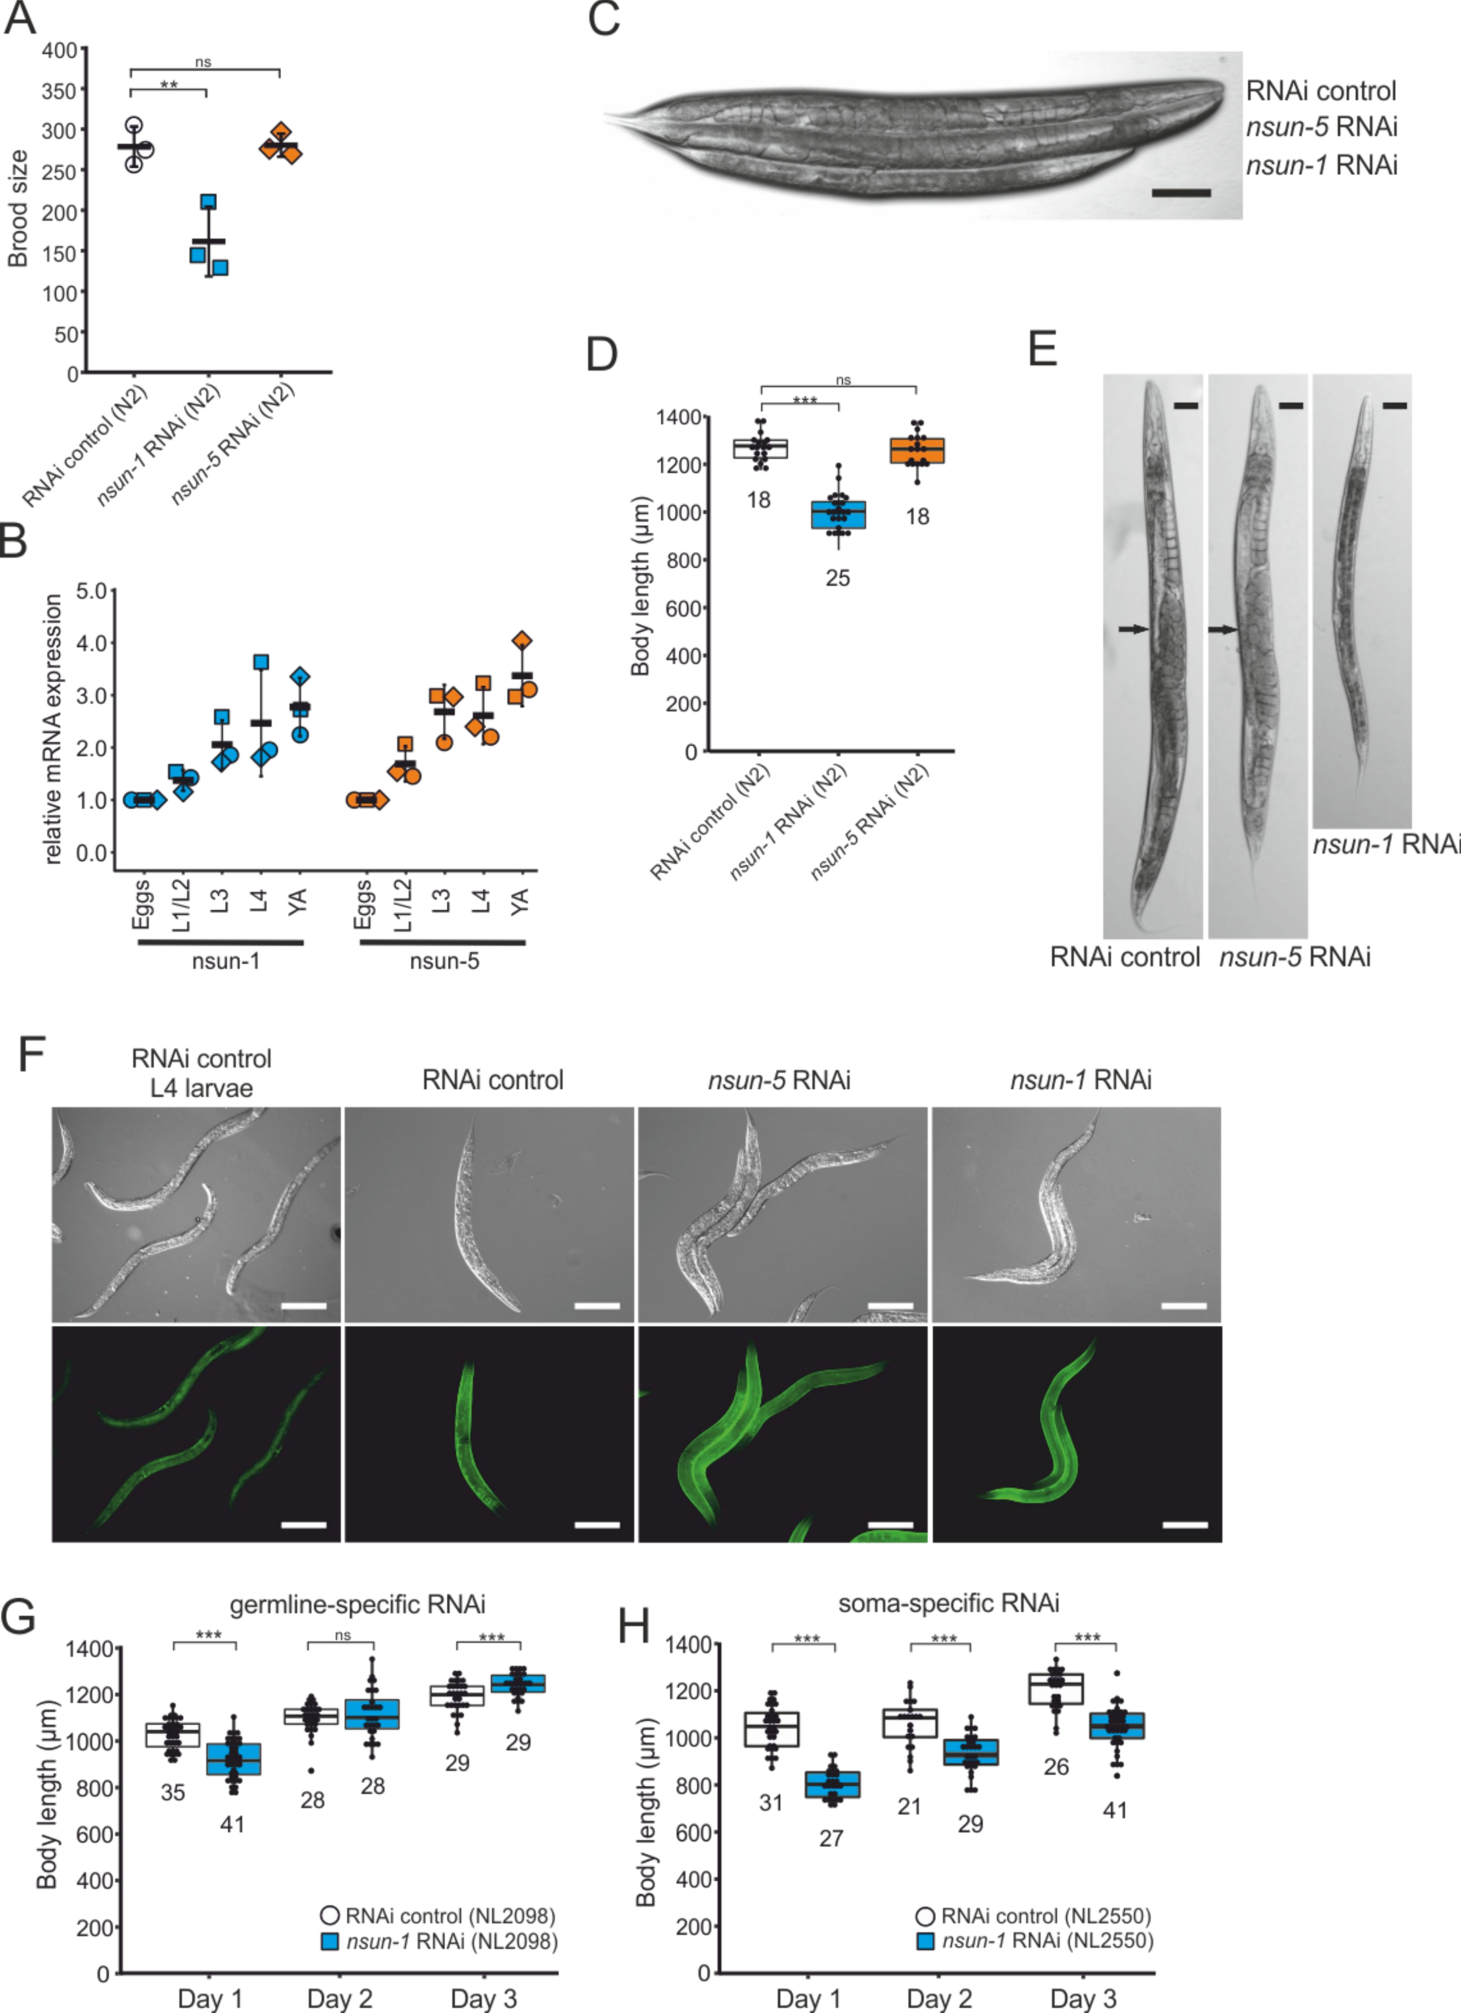

A

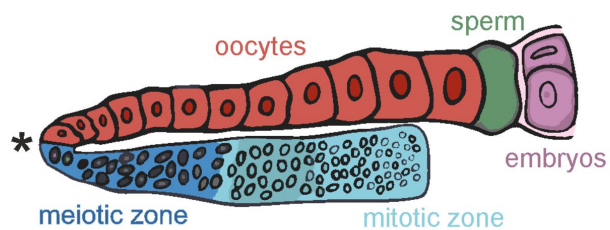

B

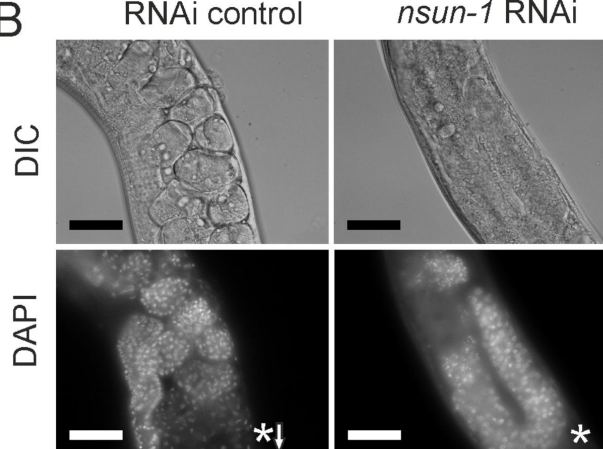

C

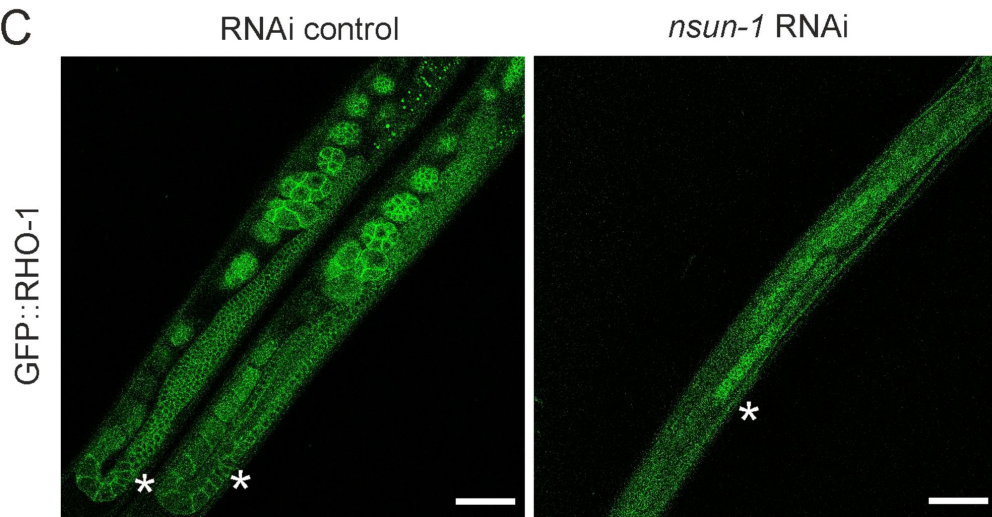

D

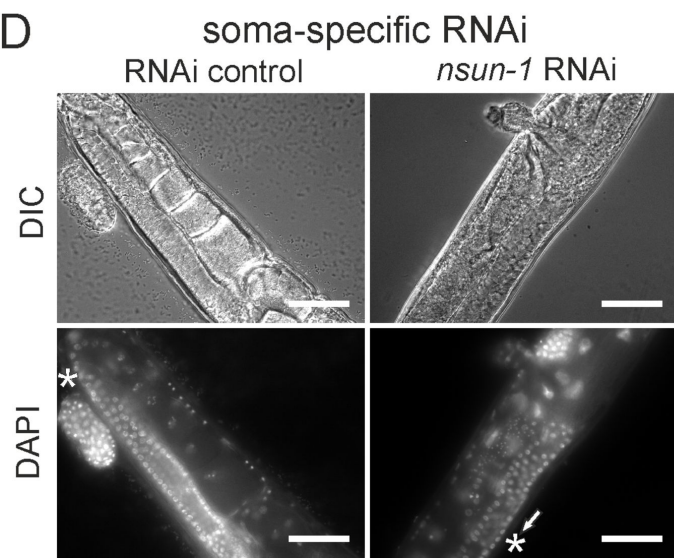

E

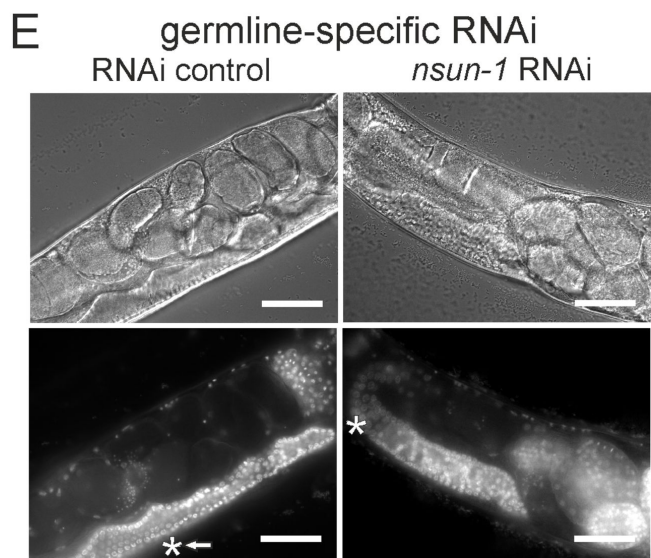

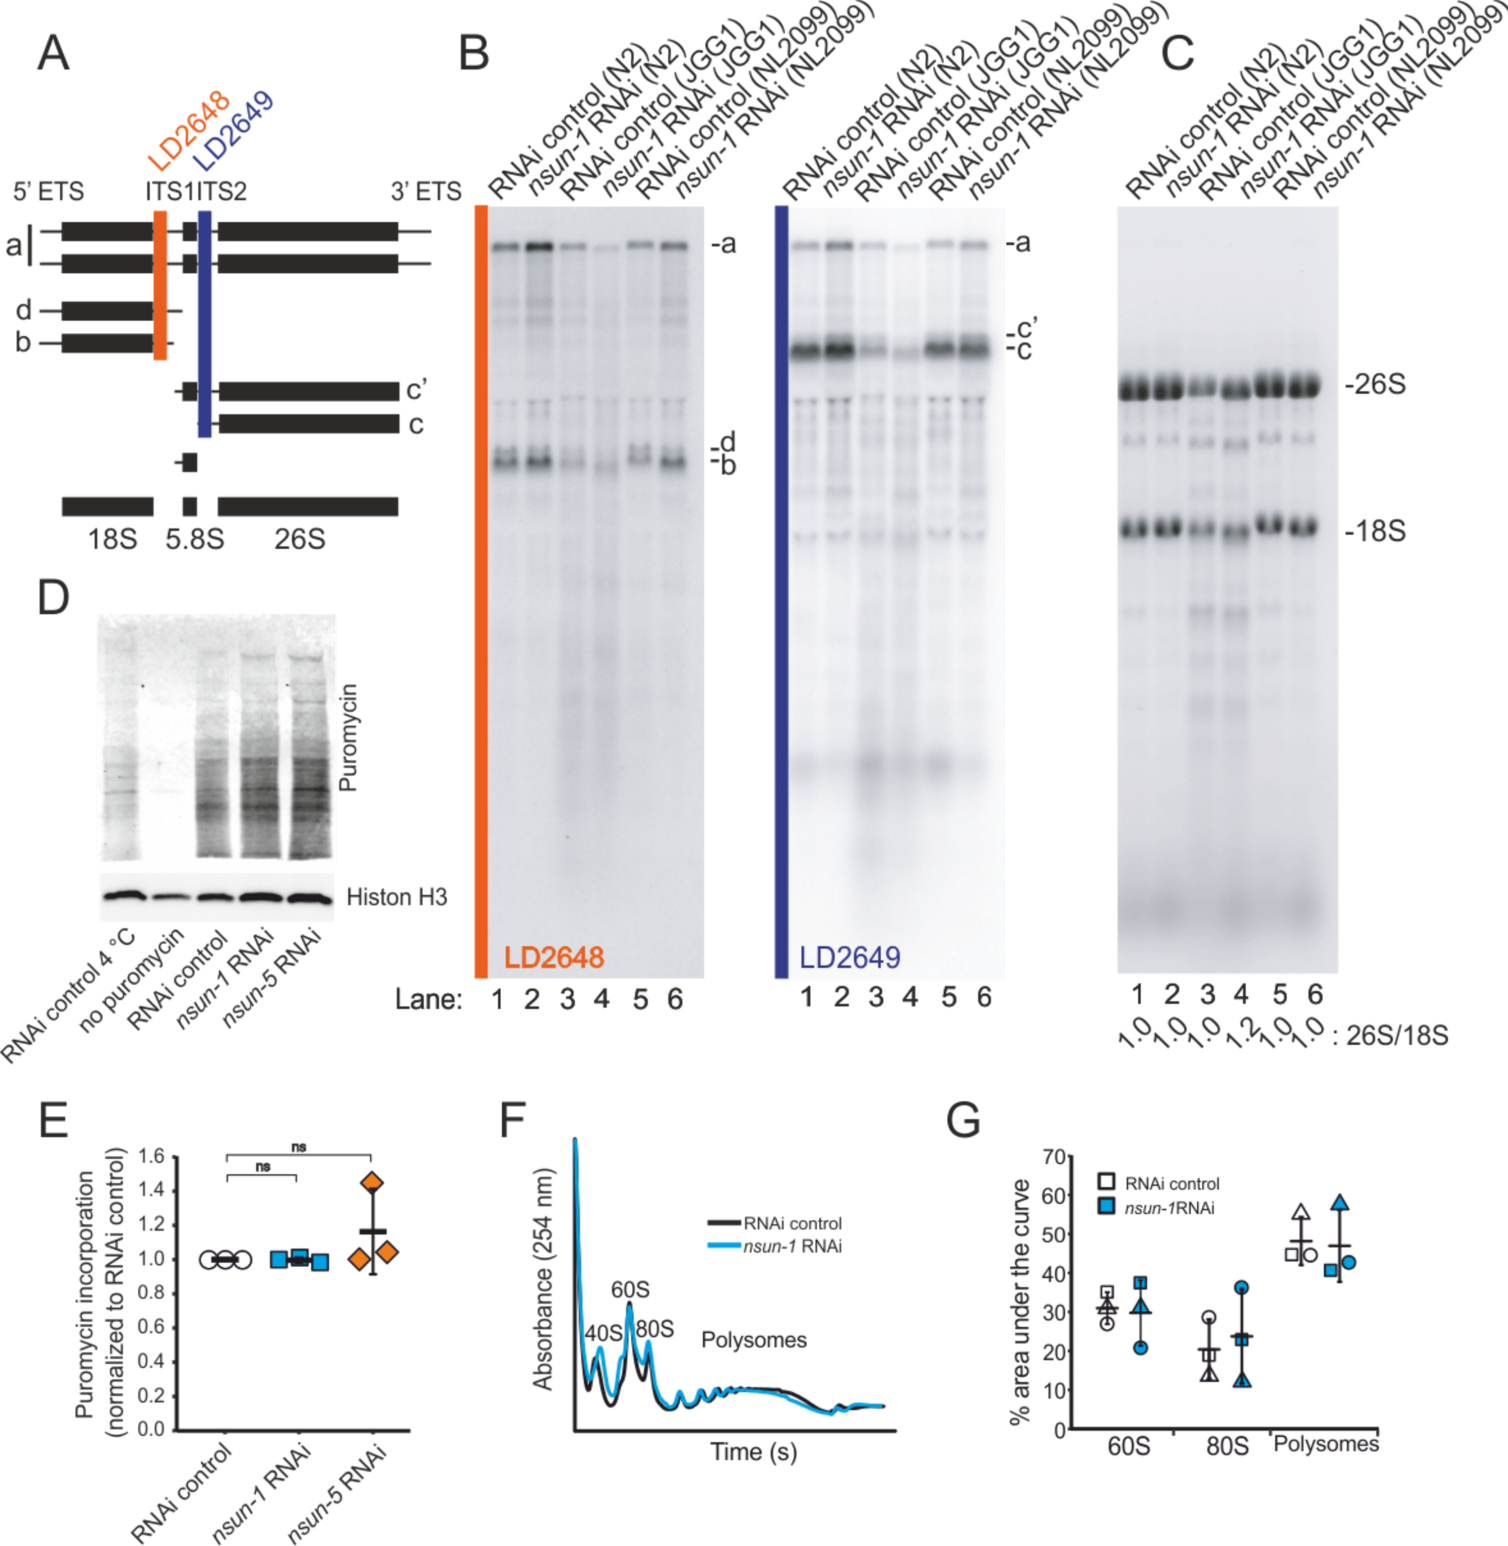

A

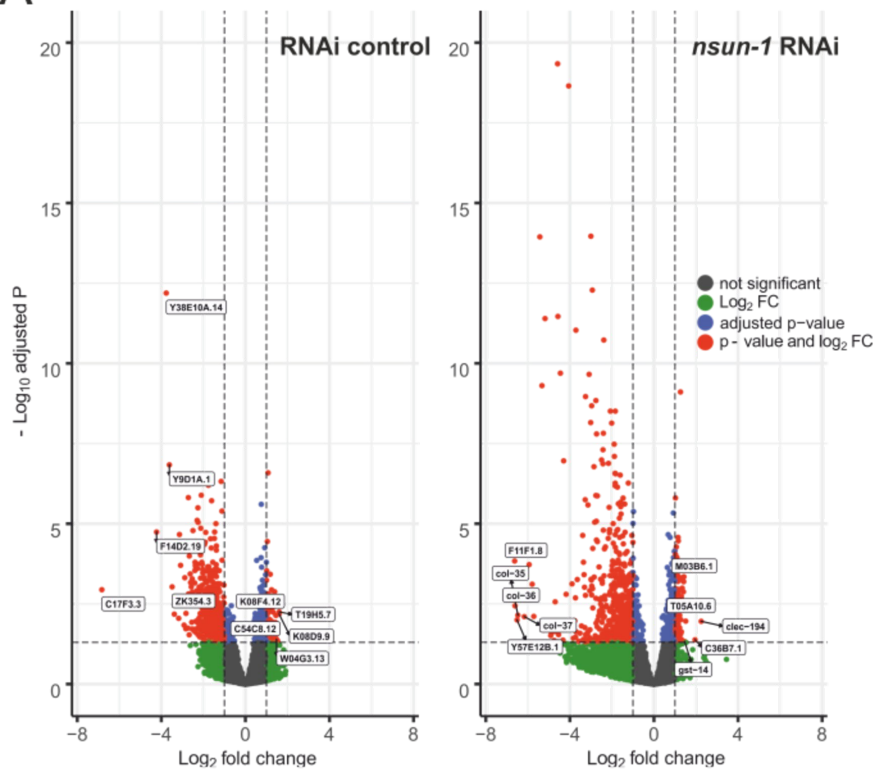

D

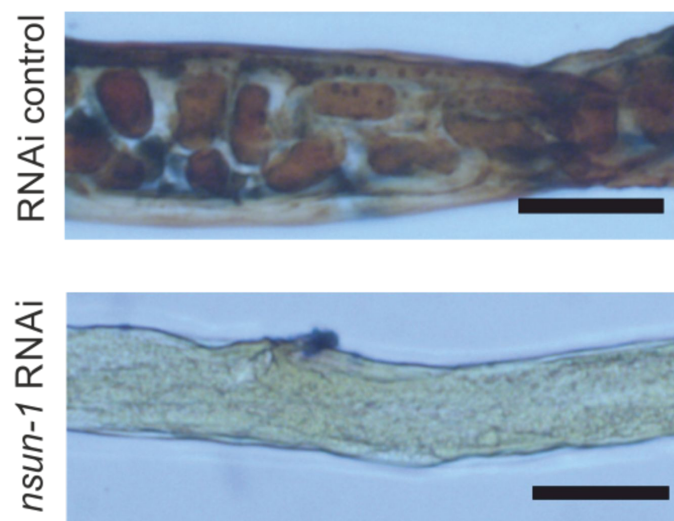

B

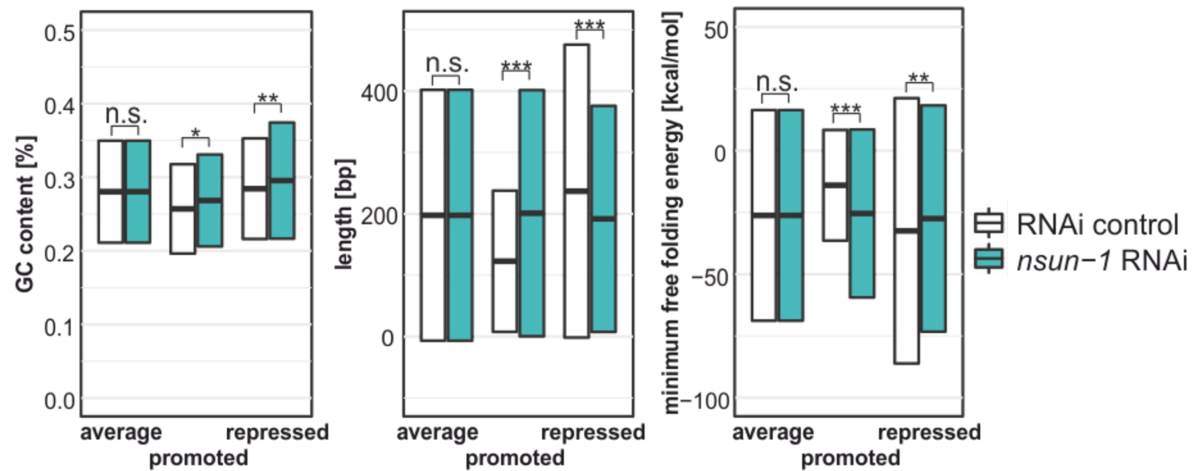

C

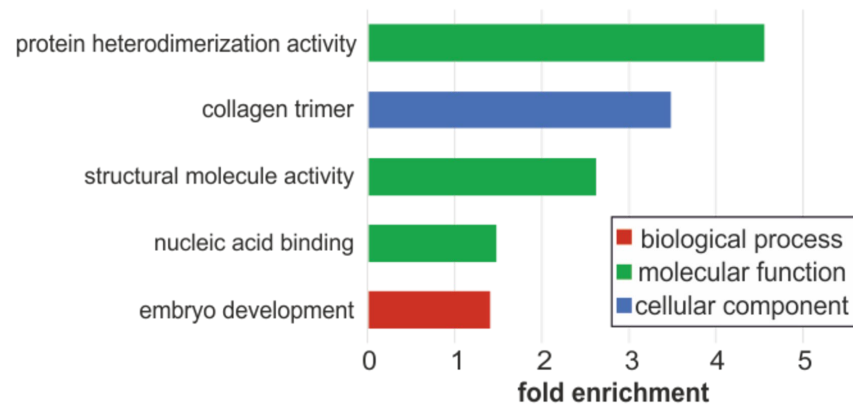

E

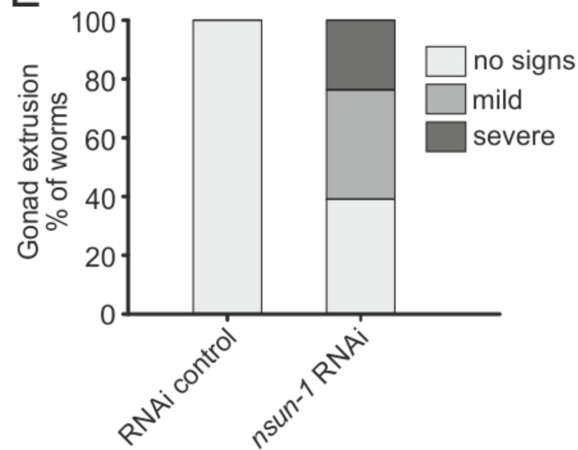

F

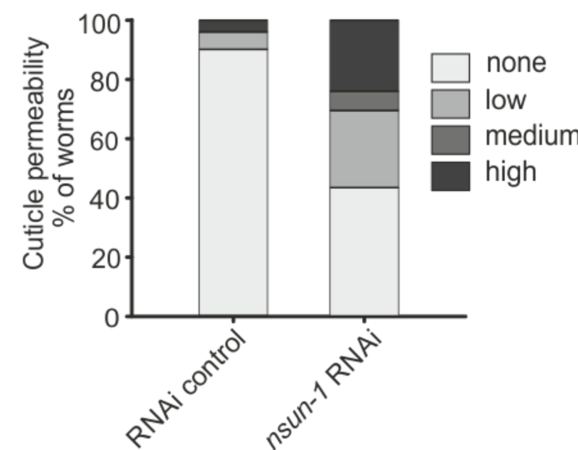



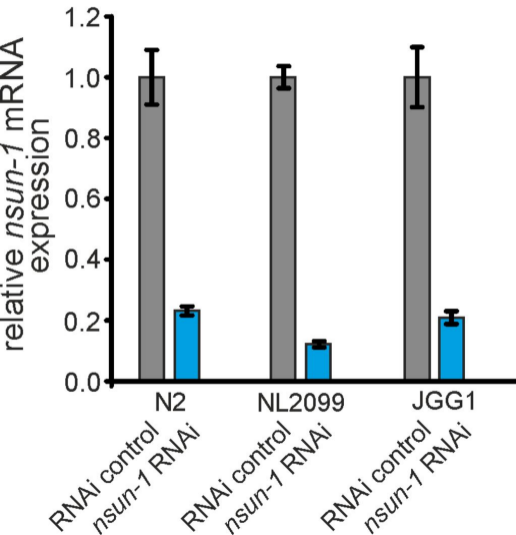

**A**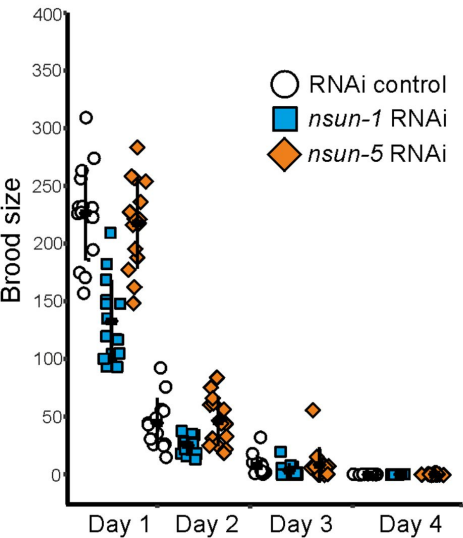**B**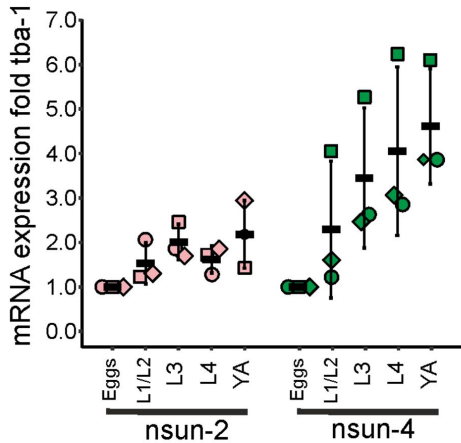**C**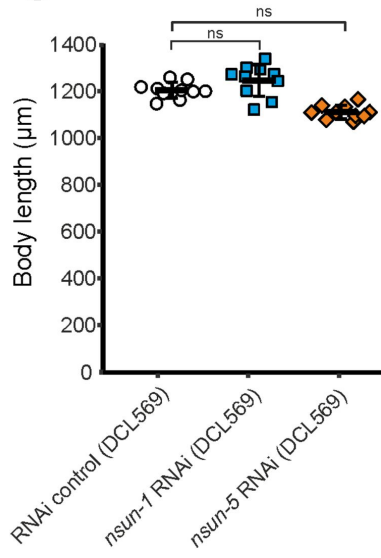

A

RNAi control

*nsun-5* RNAi*nsun-1* RNAi

DIC

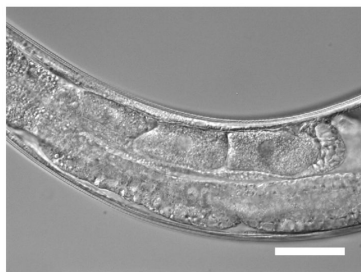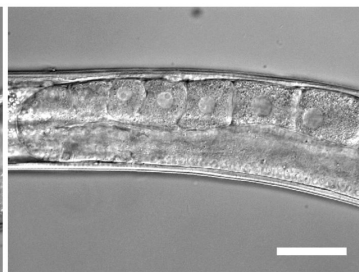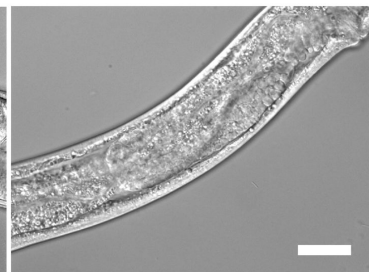

GFP::RHO-1

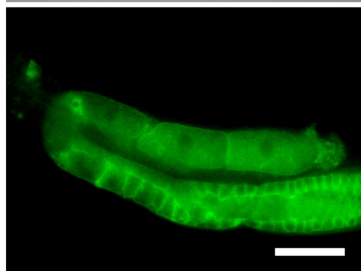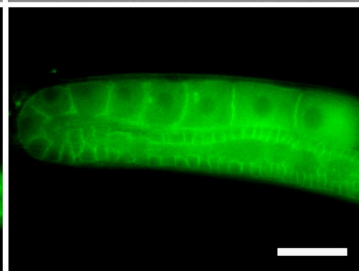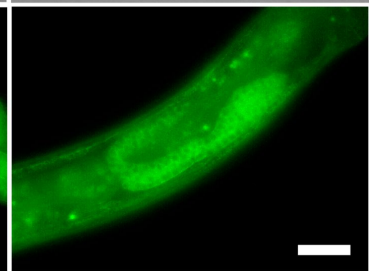

B

DIC

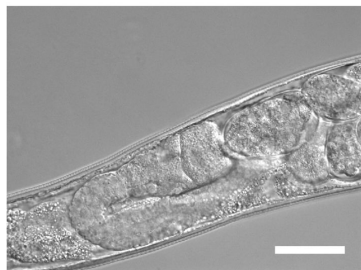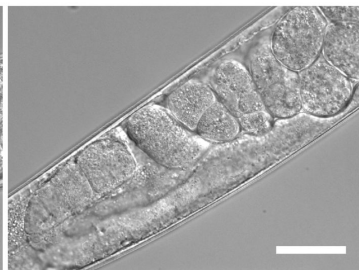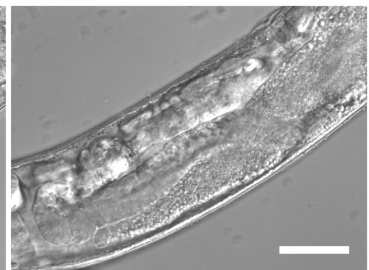

NMY-2::GFP

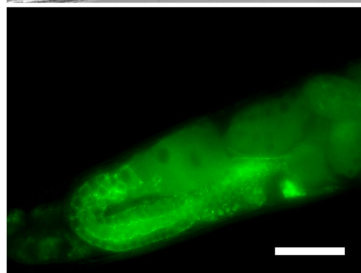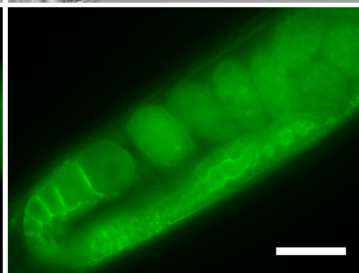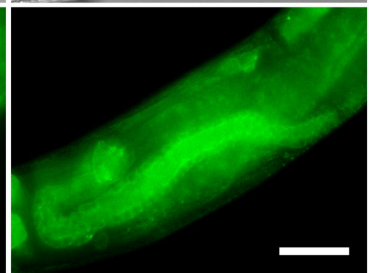

## soma-specific RNAi

**A**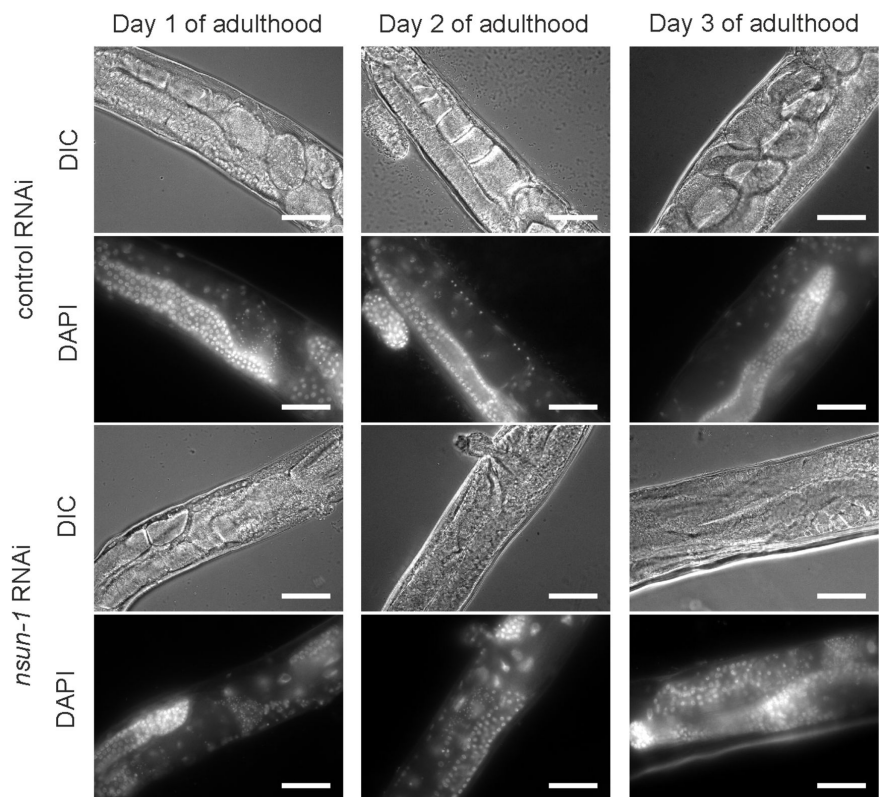**B**

## germline-specific RNAi

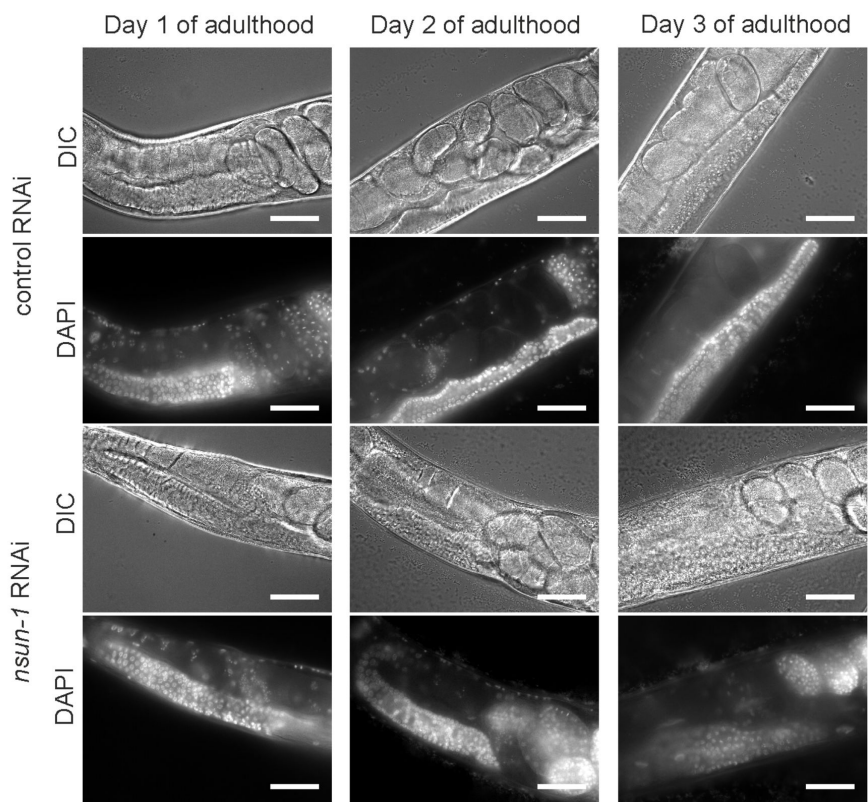

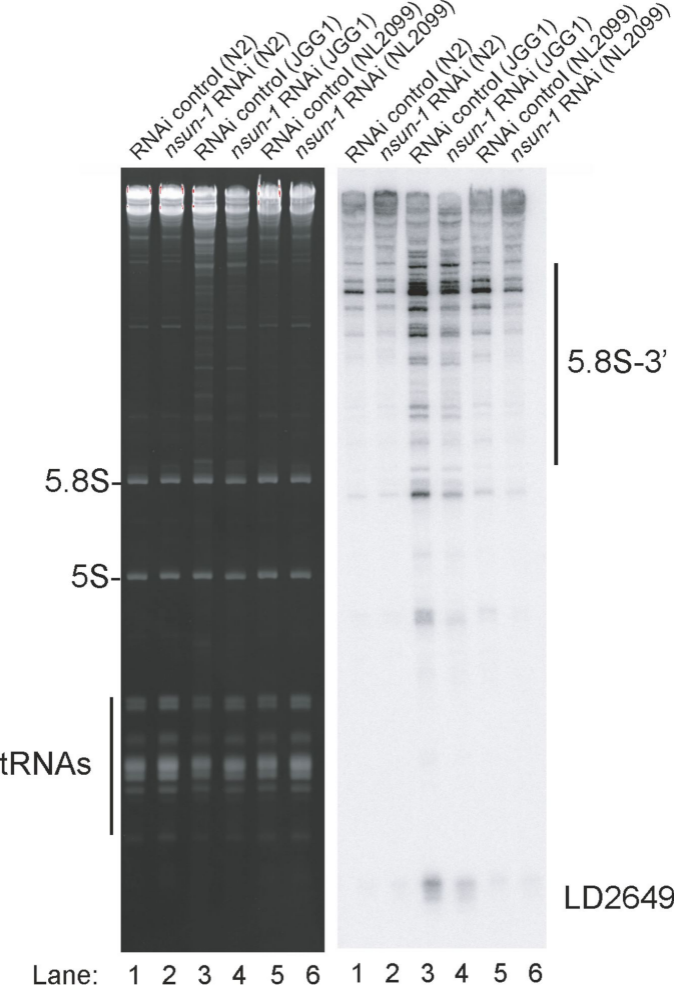

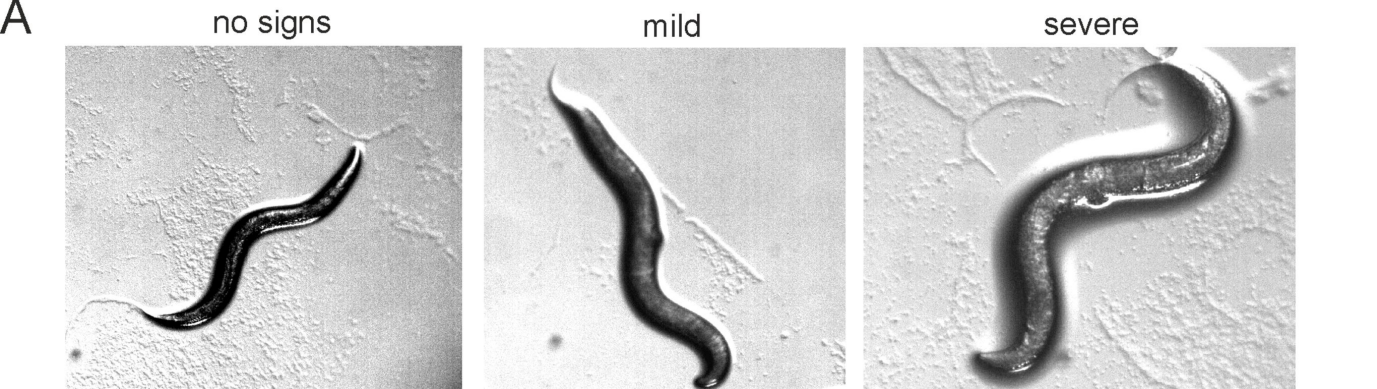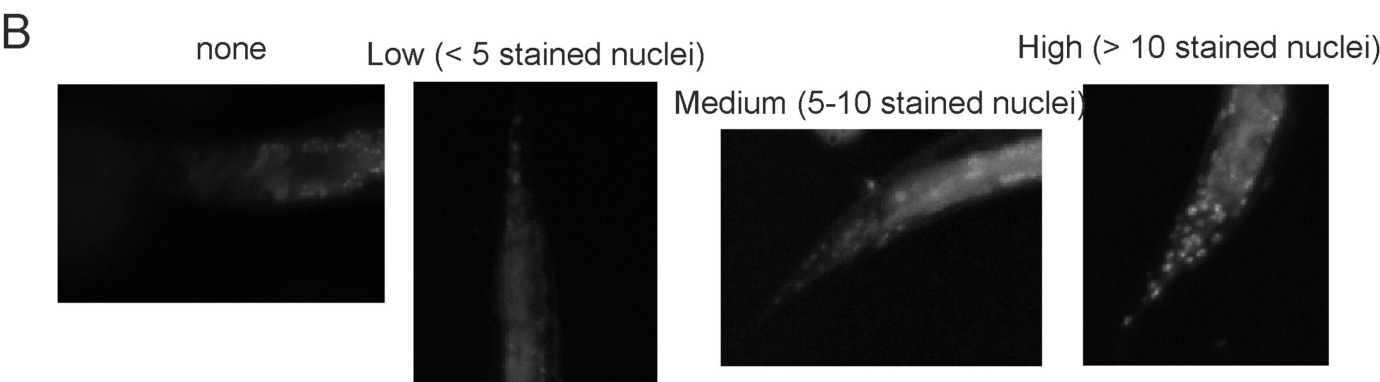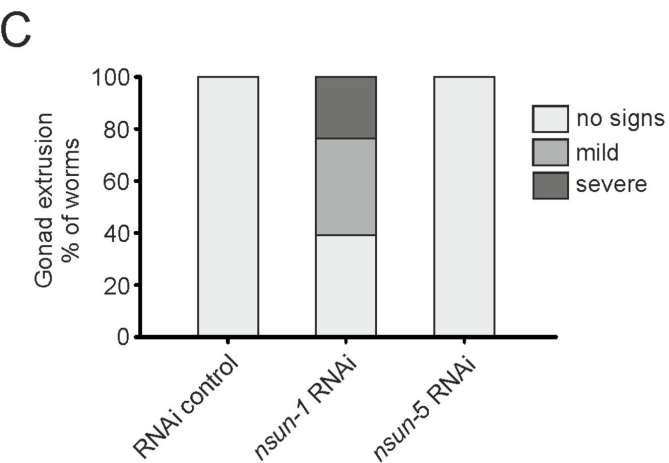

Source: http://biorxiv.org/content/10.1101/2020.03.16.993469v1.full.pdf
